# Supplementary material for: In vitro fermentation characteristics of polysaccharide from Scrophularia ningpoensis and its effects on type 2 diabetes mellitus gut microbiota
Source: PeerJ. 2025 May 5;13:e19374. doi: 10.7717/peerj.19374 (PMC12060902; doi:10.7717/peerj.19374)
Supplement: Supplemental Information 2 [file peerj-13-19374-s002.xlsx]

## Sheet: Supplementary Table 2 otu_taxon
Table S2 Percent of community abundance on phylum level.
#OTU ID	HC1	HC2	HC3	HC4	HC5	HC6	HC7	HC8	HC+SNP1	HC+SNP2	HC+SNP3	HC+SNP4	HC+SNP5	HC+SNP6	HC+SNP7	HC+SNP8	T2DM1	T2DM2	T2DM3	T2DM4	T2DM5	T2DM6	T2DM7	T2DM8	T2DM+SNP1	T2DM+SNP2	T2DM+SNP3	T2DM+SNP4	T2DM+SNP5	T2DM+SNP6	T2DM+SNP7	T2DM+SNP8
d__Bacteria;k__norank_d__Bacteria;p__Actinobacteriota	0.00206536	0.112907	0.0593036	0.0237961	0.00562653	0.0941362	0.0581264	0.0688547	0.0302397	0.142518	0.448166	0.169641	0.02	0.0916606	0.089898	0.184345	0.00569437	0.0587977	0.00566991	0.0822443	0.0110088	0.03342	0.250101	0.0108369	0.0209042	0.25108	0.00486662	0.422189	0.0645794	0.0472655	0.688202	0.0439297
d__Bacteria;k__norank_d__Bacteria;p__Bacteroidota	0.0230854	0.143816	0.222062	0.200486	0.133338	0.187122	0.222013	0.169816	0.344367	0.568588	0.323464	0.333116	0.127288	0.199094	0.420112	0.0462324	0.10274	0.25816	0.131439	0.107048	0.111549	0.294008	0.0618792	0.024894	0.017621	0.444873	0.0486054	0.0699509	0.0137945	0.0295447	0.000845055	0.0561429
d__Bacteria;k__norank_d__Bacteria;p__Bdellovibrionota	0	0	0	0	0	0	3.31e-05	0	0	0	0	0	0	0	0	0	0	0	0	0	0	0	0	0	0	0	0	0	0	0	0	0
d__Bacteria;k__norank_d__Bacteria;p__Campilobacterota	0	0	0	0	0	0	0	0	0	0	0	0	0	0	2.89e-05	0	0	0	0	0	0	0	0	0	0	0	0	0	0	5.99e-05	0	0
d__Bacteria;k__norank_d__Bacteria;p__Cyanobacteria	0	0	0	0	0	0	0	0	0	0	0	0	0	0	0	0	0	0	0	0	6.8e-05	0	0	0	0	0	0	0	2.93e-05	0	0	0
d__Bacteria;k__norank_d__Bacteria;p__Desulfobacterota	0.00413072	0.0490634	0.00685528	0.0229973	0.0285927	0.0103128	0.00619	0.00648674	0.000289222	0.00172102	0.00026436	0.00568487	0.00025825	0.000847086	0.000202213	0.00033005	0.0088349	0	0.00285214	0.00826777	0.0114845	0.00417292	0.00879195	0.000154813	0.000843399	0	3.04e-05	0.000467508	0.000585754	0.000179603	0.00171737	0.000347146
d__Bacteria;k__norank_d__Bacteria;p__Firmicutes	0.534995	0.452463	0.221409	0.350651	0.347217	0.224921	0.144919	0.53831	0.512083	0.284057	0.0708486	0.380604	0.474032	0.681817	0.485426	0.763456	0.157579	0.167418	0.299784	0.480397	0.203357	0.124858	0.366611	0.0319225	0.813187	0.200025	0.893269	0.503594	0.228708	0.585416	0.288	0.861805
d__Bacteria;k__norank_d__Bacteria;p__Fusobacteriota	0.000333122	0	8.16e-05	0	0	0	0	2.98e-05	0.000931936	0	0	0	0	0	0	2.54e-05	0	3.66e-05	0	0.000666756	0	0	0	0	0	0.000277641	0	2.92e-05	0	2.99e-05	0	0
d__Bacteria;k__norank_d__Bacteria;p__Patescibacteria	0	0	0	0	0	0	6.62e-05	0	0	0	0	0	0	0	0	0	0	0	3.44e-05	0.000166689	0	0	3.36e-05	0	0	0	0	5.84e-05	0	0	5.45e-05	0
d__Bacteria;k__norank_d__Bacteria;p__Proteobacteria	0.435358	0.240176	0.490044	0.399341	0.48289	0.4824	0.563555	0.216443	0.110097	0.00281891	0.156879	0.110134	0.375294	0.0225792	0.00349539	0.00208185	0.724289	0.515478	0.559946	0.320076	0.66114	0.543395	0.312315	0.931727	0.146872	0.10356	0.0532287	0.00315568	0.69163	0.337175	0.0211264	0.0369552
d__Bacteria;k__norank_d__Bacteria;p__Synergistota	0	0	2.72e-05	0.00026625	0.000672352	8.52e-05	0.000397219	0	0	0	0	0.000113132	0.000200861	0	8.67e-05	0	0	0	0	0	0	0	0	0.000154813	0	0	0	0	0	0	0	0
d__Bacteria;k__norank_d__Bacteria;p__Verrucomicrobiota	0	0.0015744	0	0.0017639	0.00155703	0.000213074	0.00443562	0	0	0.000148364	0	0.000197981	0.00275466	0.000175259	0.000202213	0	0.00051767	0	0	0.000666756	0.00105331	0	0	0.000309626	0	0	0	0.00040907	0.000527179	0	0	0
d__Bacteria;k__norank_d__Bacteria;p__WPS-2	0	0	0	0	0	0	0	0	0	0	0	0	0	0	0	0	0	0	0	0	0	0	0	0	0	0	0	0	0	0	0	0
d__Bacteria;k__norank_d__Bacteria;p__unclassified_k__norank_d__Bacteria	3.33e-05	0	0.000217628	0.000698905	0.000106161	0.000809682	0.000264813	5.95e-05	0.00199242	0.000148364	0.000377658	0.000509093	0.000172166	0.00382649	0.000548863	0.00352899	0.000345113	0.000109902	0.000274905	0.000466729	0.000339778	0.000146418	0.000268456	0	0.000572306	0.000185094	0	0.000146096	0.000146439	0.000329272	5.45e-05	0.000820526
