# Supplementary material for: In vitro fermentation characteristics of polysaccharide from Scrophularia ningpoensis and its effects on type 2 diabetes mellitus gut microbiota
Source: PeerJ. 2025 May 5;13:e19374. doi: 10.7717/peerj.19374 (PMC12060902; doi:10.7717/peerj.19374)
Supplement: Supplemental Information 3 [file peerj-13-19374-s003.xlsx]

## Sheet: otu_taxon_Genus.percent.full
Table S3 Percent of community abundance on genus level.
#OTU ID	HC1	HC2	HC3	HC4	HC5	HC6	HC7	HC8	HC+SNP1	HC+SNP2	HC+SNP3	HC+SNP4	HC+SNP5	HC+SNP6	HC+SNP7	HC+SNP8	T2DM1	T2DM2	T2DM3	T2DM4	T2DM5	T2DM6	T2DM7	T2DM8	T2DM+SNP1	T2DM+SNP2	T2DM+SNP3	T2DM+SNP4	T2DM+SNP5	T2DM+SNP6	T2DM+SNP7	T2DM+SNP8
d__Bacteria;k__norank_d__Bacteria;p__Actinobacteriota;c__Actinobacteria;o__Actinomycetales;f__Actinomycetaceae;g__Actinomyces	3.33122e-05	0	0	3.32812e-05	3.5387e-05	4.26148e-05	6.62032e-05	2.97557e-05	0	0	0	2.82829e-05	0	0	0	0	0	0	3.43631e-05	0.00030004	0.000135911	0	0.000134228	3.09626e-05	0	0	0	2.92193e-05	5.85754e-05	0	2.72598e-05	0
d__Bacteria;k__norank_d__Bacteria;p__Actinobacteriota;c__Actinobacteria;o__Bifidobacteriales;f__Bifidobacteriaceae;g__Alloscardovia	0	3.21306e-05	0	0	0	0	0	0	0	0	0	0	0	0	0	0	0	0	0	0	0	0	0	0	0	0	0	0	0	0	0	0
d__Bacteria;k__norank_d__Bacteria;p__Actinobacteriota;c__Actinobacteria;o__Bifidobacteriales;f__Bifidobacteriaceae;g__Bifidobacterium	0.00029981	0.0857565	0.0256257	0.00435984	3.5387e-05	0.0358391	0.022145	0.0556729	0.0298862	0.141776	0.4476	0.140283	0.013056	0.0591792	0.0837161	0.184269	0.00113887	0.0568561	0.00254287	0.0512068	0.00258231	0.0158132	0.137114	0.00594482	0.0174704	0.251049	0.00486662	0.416959	0.0571111	0.0471757	0.625968	0.0430145
d__Bacteria;k__norank_d__Bacteria;p__Actinobacteriota;c__Actinobacteria;o__Bifidobacteriales;f__Bifidobacteriaceae;g__Gardnerella	3.33122e-05	0	0	0	0	0	0	0	0	0	0	2.82829e-05	0	0	0	5.07769e-05	0	7.32681e-05	0	0	0	0	0	0	0	0	0	0	0	0	0	0
d__Bacteria;k__norank_d__Bacteria;p__Actinobacteriota;c__Actinobacteria;o__Corynebacteriales;f__Corynebacteriaceae;g__Corynebacterium	0	0	0	0	0	0	3.31016e-05	2.97557e-05	0	0	0	0	0	0	0	0	0	0	0	0	0	0	3.3557e-05	0	0	0	0	0	0	0	8.17795e-05	0
d__Bacteria;k__norank_d__Bacteria;p__Actinobacteriota;c__Actinobacteria;o__Corynebacteriales;f__Nocardiaceae;g__Rhodococcus	0	0	0	0	0	0	0	0	0	0	0	0	0	0	0	0	0	7.32681e-05	0	0	0	0	0	3.09626e-05	0	0	0	0	0	0	0	0
d__Bacteria;k__norank_d__Bacteria;p__Actinobacteriota;c__Actinobacteria;o__Micrococcales;f__Microbacteriaceae;g__Leucobacter	0	0	0	0	0	0	0	0	0	0	0	0	0	0	0	0	0	0	0	0	0	0	0	0	0	0	0	0	0	0	5.45197e-05	0
d__Bacteria;k__norank_d__Bacteria;p__Actinobacteriota;c__Actinobacteria;o__Micrococcales;f__Microbacteriaceae;g__Microbacterium	0	0	0	0	0	0	0	0	0	0	0	0	0	0	0	0	0	0	0	0	3.39778e-05	0	0	0	0	0	0	0	0	0	0	0
d__Bacteria;k__norank_d__Bacteria;p__Actinobacteriota;c__Actinobacteria;o__Micrococcales;f__Micrococcaceae;g__Micrococcus	0	0	0	0	0	0	0	0	0	0	0	0	0	0	0	0	0	0	0	0	0	0	0	0	0	0	0	0	0	0	2.72598e-05	0
d__Bacteria;k__norank_d__Bacteria;p__Actinobacteriota;c__Actinobacteria;o__Micrococcales;f__Micrococcaceae;g__Rothia	0	0	2.72035e-05	6.65624e-05	3.5387e-05	4.26148e-05	6.62032e-05	0	0	0	0	2.82829e-05	0	0	0	0	0	0	0	3.33378e-05	3.39778e-05	0	3.3557e-05	3.09626e-05	0	0	0	0	8.78632e-05	0	0	0
d__Bacteria;k__norank_d__Bacteria;p__Actinobacteriota;c__Actinobacteria;o__Propionibacteriales;f__Propionibacteriaceae;g__Cutibacterium	0	0	0	0	0	0	0	0	3.21357e-05	0	0	0	0	0	0	2.53884e-05	0	0	0	0	0	0	0	0	0	0	0	0	0	0	0	0
d__Bacteria;k__norank_d__Bacteria;p__Actinobacteriota;c__Coriobacteriia;o__Coriobacteriales;f__Atopobiaceae;g__Coriobacteriaceae_UCG-002	0	0	0	0	0	0	0	0	0	0	0	0	0	0	2.88875e-05	0	0	0	0	0	0	0	0	0	0	0	0	0	0	0	0	0
d__Bacteria;k__norank_d__Bacteria;p__Actinobacteriota;c__Coriobacteriia;o__Coriobacteriales;f__Atopobiaceae;g__Olsenella	0	0	0	3.32812e-05	0.000106161	0	0.00019861	0	0	0	0	0	0.00106169	0	0	0	0	0	0	0	0.000203867	0	0	9.28879e-05	0	0	0	0	5.85754e-05	0	0	0
d__Bacteria;k__norank_d__Bacteria;p__Actinobacteriota;c__Coriobacteriia;o__Coriobacteriales;f__Coriobacteriaceae;g__Collinsella	0	0	0.0310936	0.0160083	0	0.0565925	0.0285336	2.97557e-05	0	0	0.000453189	0.0273779	0	0.0323937	0.00615305	0	0.00331309	0	3.43631e-05	0.0234031	0.00421324	0.0175336	0.0999664	0.00253894	0.00343384	0	0	0.00473352	0.00664831	2.99338e-05	0.060326	0.00072585
d__Bacteria;k__norank_d__Bacteria;p__Actinobacteriota;c__Coriobacteriia;o__Coriobacteriales;f__Coriobacteriaceae;g__Enorma	0	0	0	0	0.000212322	0	0	0	0	0	0	0	0.000373027	0	0	0	0	0	0	0	0	0	0	0	0	0	0	0	0	0	0	0
d__Bacteria;k__norank_d__Bacteria;p__Actinobacteriota;c__Coriobacteriia;o__Coriobacteriales;f__Coriobacteriales_Incertae_Sedis;g__Raoultibacter	0	3.21306e-05	0	0	3.5387e-05	0	0	2.97557e-05	0	0	0	0	2.86944e-05	0	0	0	0	0	0	0	3.39778e-05	0	0	0	0	0	0	0	0	0	0	0
d__Bacteria;k__norank_d__Bacteria;p__Actinobacteriota;c__Coriobacteriia;o__Coriobacteriales;f__Coriobacteriales_Incertae_Sedis;g__norank_f__Coriobacteriales_Incertae_Sedis	0	0	8.16104e-05	0.000465937	3.5387e-05	4.26148e-05	0	0	0	0	3.77658e-05	0.00113132	0.000229555	2.92099e-05	0	0	0	0	0	0	0.000101933	0	6.71141e-05	0.000154813	0	0	0	0	8.78632e-05	0	0.000109039	9.46761e-05
d__Bacteria;k__norank_d__Bacteria;p__Actinobacteriota;c__Coriobacteriia;o__Coriobacteriales;f__Eggerthellaceae;g__Adlercreutzia	0	0.0038878	0.00193145	0.0015975	0.000247709	0.000298304	0.000264813	0.000119023	0	0.000237382	7.55316e-05	0.000197981	0.000315638	0	0	0	0	0	0	0	0.000407733	0	0.0038255	0.000123851	0	0	0	0	0.000205014	0	0.000327118	0
d__Bacteria;k__norank_d__Bacteria;p__Actinobacteriota;c__Coriobacteriia;o__Coriobacteriales;f__Eggerthellaceae;g__CHKCI002	0	0	0	0	0	0	0	0	0	0	0	0	0	0	0	0	0	0	0	0	0	0	0	3.09626e-05	0	0	0	0	0	0	0	0
d__Bacteria;k__norank_d__Bacteria;p__Actinobacteriota;c__Coriobacteriia;o__Coriobacteriales;f__Eggerthellaceae;g__Eggerthella	0.00169892	0.0227163	0.000353645	0.000732186	0.001097	0.000894912	3.31016e-05	0.0129437	0.000321357	0.000385745	0	0.000113132	0.000631277	0	0	0	0.00124241	0.00179507	0.00305831	0.0032671	0.00302402	7.32091e-05	0.00607383	0.00139332	0	3.0849e-05	0	5.84385e-05	5.85754e-05	0	0.000408898	0
d__Bacteria;k__norank_d__Bacteria;p__Actinobacteriota;c__Coriobacteriia;o__Coriobacteriales;f__Eggerthellaceae;g__Enterorhabdus	0	0	0	0	0	0.000255689	0	0	0	0	0	0	0	5.84197e-05	0	0	0	0	0	0	3.39778e-05	0	0	0	0	0	0	0	0	5.98677e-05	0	0
d__Bacteria;k__norank_d__Bacteria;p__Actinobacteriota;c__Coriobacteriia;o__Coriobacteriales;f__Eggerthellaceae;g__Gordonibacter	0	0	0.000190424	9.98436e-05	0	0	0	0	0	0	0	8.48488e-05	2.86944e-05	0	0	0	0	0	0	0.000200027	0	0	0.00090604	9.28879e-05	0	0	0	5.84385e-05	0.000146439	0	8.17795e-05	0
d__Bacteria;k__norank_d__Bacteria;p__Actinobacteriota;c__Coriobacteriia;o__Coriobacteriales;f__Eggerthellaceae;g__Paraeggerthella	0	0	0	0	0	0	0	0	0	0	0	0	0	0	0	0	0	0	0	0.00380051	0	0	0	0	0	0	0	0.000233754	0	0	0	0
d__Bacteria;k__norank_d__Bacteria;p__Actinobacteriota;c__Coriobacteriia;o__Coriobacteriales;f__Eggerthellaceae;g__Senegalimassilia	0	0	0	0	0	0	0.00678583	0	0	0	0	0	0	0	0	0	0	0	0	0	0	0	0	0	0	0	0	0	0	0	0	0
d__Bacteria;k__norank_d__Bacteria;p__Actinobacteriota;c__Coriobacteriia;o__Coriobacteriales;f__Eggerthellaceae;g__Slackia	0	0	0	0.000232968	0.0037864	0	0	0	0	0	0	0.000113132	0.00424677	0	0	0	0	0	0	0	0	0	0.000671141	9.28879e-05	0	0	0	0	0	0	0	3.15587e-05
d__Bacteria;k__norank_d__Bacteria;p__Actinobacteriota;c__Coriobacteriia;o__Coriobacteriales;f__Eggerthellaceae;g__norank_f__Eggerthellaceae	0	0	0	0	0	0	0	0	0	0	0	0	0	0	0	0	0	0	0	0	0	0	0	0	0	0	0	0	0	0	0	0
d__Bacteria;k__norank_d__Bacteria;p__Actinobacteriota;c__Coriobacteriia;o__Coriobacteriales;f__Eggerthellaceae;g__unclassified_f__Eggerthellaceae	0	9.63917e-05	0	6.65624e-05	0	0	0	0	0	0	0	0	0	0	0	0	0	0	0	0	3.39778e-05	0	0.000771812	0	0	0	0	0	0	0	0.000790535	0
d__Bacteria;k__norank_d__Bacteria;p__Actinobacteriota;c__Coriobacteriia;o__Coriobacteriales;f__norank_o__Coriobacteriales;g__norank_f__norank_o__Coriobacteriales	0	0	0	0	0	0	0	0	0	0	0	0	2.86944e-05	0	0	0	0	0	0	0	0.000135911	0	0	0	0	0	0	0	2.92877e-05	0	0	0
d__Bacteria;k__norank_d__Bacteria;p__Actinobacteriota;c__Coriobacteriia;o__Coriobacteriales;f__unclassified_o__Coriobacteriales;g__unclassified_o__Coriobacteriales	0	0.000385567	0	9.98436e-05	0	0.000127845	0	0	0	0.000118691	0	0.000254546	0	0	0	0	0	0	0	0	3.39778e-05	0	0.000503356	0.000278664	0	0	0	0	8.78632e-05	0	0	6.31174e-05
d__Bacteria;k__norank_d__Bacteria;p__Actinobacteriota;c__unclassified_p__Actinobacteriota;o__unclassified_p__Actinobacteriota;f__unclassified_p__Actinobacteriota;g__unclassified_p__Actinobacteriota	0	0	0	0	0	0	0	0	0	0	0	0	0	0	0	0	0	0	0	3.33378e-05	0	0	0	0	0	0	0	0.000116877	0	0	0	0
d__Bacteria;k__norank_d__Bacteria;p__Bacteroidota;c__Bacteroidia;o__Bacteroidales;f__Bacteroidaceae;g__Bacteroides	0.0165895	0.134756	0.211262	0.173095	0.0835486	0.121111	0.174148	0.140387	0.337972	0.113676	0.320556	0.284102	0.0747489	0.0850007	0.0169281	0.0419163	0.0841386	0.223028	0.113604	0.0979464	0.0821922	0.1533	0.0263758	0.00777162	0.014639	0.435464	0.0467196	0.0640778	0.00565253	0.0268507	0.000190819	0.0106037
d__Bacteria;k__norank_d__Bacteria;p__Bacteroidota;c__Bacteroidia;o__Bacteroidales;f__Barnesiellaceae;g__Barnesiella	0	0	0	0.00136453	0	0.000213074	0	0	0	0	0	0.00254546	0	0.000204469	0	0	0	0	0	0	0.00278618	0	0	0.000402514	0	0	0	0	0.00281162	0	0	0.000410263
d__Bacteria;k__norank_d__Bacteria;p__Bacteroidota;c__Bacteroidia;o__Bacteroidales;f__Barnesiellaceae;g__Coprobacter	0	0	0	0	0	4.26148e-05	0	0	0	0	0.000226595	0	0	0	0	0	0	0	0	0	0	0	3.3557e-05	0	0	0	0	0	0	0	0	0
d__Bacteria;k__norank_d__Bacteria;p__Bacteroidota;c__Bacteroidia;o__Bacteroidales;f__Marinifilaceae;g__Butyricimonas	0	0	0	0.000965155	0.0019109	0.000852297	0	0	0	0	0	0.00183839	0.000286944	0.000350518	0	2.53884e-05	3.45113e-05	0	0	0.00163355	0.000713533	0.00040265	0.000704698	0.000154813	0	0	0	5.84385e-05	0.000205014	5.98677e-05	0	6.31174e-05
d__Bacteria;k__norank_d__Bacteria;p__Bacteroidota;c__Bacteroidia;o__Bacteroidales;f__Marinifilaceae;g__Odoribacter	0	0	8.16104e-05	0.000632343	0.000424643	0.000170459	0	0	0	0	7.55316e-05	0.00288486	0.000286944	8.76296e-05	0	5.07769e-05	0	0	0	0	0.000951378	0	6.71141e-05	6.19253e-05	0	0	0	0	0.000439316	0	0	3.15587e-05
d__Bacteria;k__norank_d__Bacteria;p__Bacteroidota;c__Bacteroidia;o__Bacteroidales;f__Muribaculaceae;g__norank_f__Muribaculaceae	0	0	5.4407e-05	0.00379406	0	4.26148e-05	0	0	0	0	3.77658e-05	0.0081172	8.60832e-05	2.92099e-05	2.88875e-05	0	3.45113e-05	0	0	0	0	0	0.000234899	0	0	0	0	0	0	0.000119735	0	6.31174e-05
d__Bacteria;k__norank_d__Bacteria;p__Bacteroidota;c__Bacteroidia;o__Bacteroidales;f__Prevotellaceae;g__Alloprevotella	0	0	0	0	0	0	0	0	0	0	0	0	0	0	0	0	0	0	0	0	0	0	0	0.000278664	0	0	0	0	5.85754e-05	0	0	0.00126235
d__Bacteria;k__norank_d__Bacteria;p__Bacteroidota;c__Bacteroidia;o__Bacteroidales;f__Prevotellaceae;g__Paraprevotella	0	0	0	0.000865311	0.000707739	0.000596608	6.62032e-05	0	0	0	0	0.00288486	5.73888e-05	0.000379728	5.77751e-05	0	6.90226e-05	0	0	0	0.000645578	0	0	0	0	0	0	0	2.92877e-05	0	0	0
d__Bacteria;k__norank_d__Bacteria;p__Bacteroidota;c__Bacteroidia;o__Bacteroidales;f__Prevotellaceae;g__Prevotella	6.66245e-05	0.00713299	0	0	0.00852826	0.020583	0.0240649	0	3.21357e-05	0.446723	0	0	0.0295839	0.107755	0.397319	0	0.000828272	0	0	0	0.000577622	7.32091e-05	0	0.00157909	0.000451821	3.0849e-05	6.08328e-05	0	0.000117151	0	8.17795e-05	0.0419099
d__Bacteria;k__norank_d__Bacteria;p__Bacteroidota;c__Bacteroidia;o__Bacteroidales;f__Prevotellaceae;g__Prevotellaceae_Ga6A1_group	0	0	0	0	0	0	0	0	0	0	0	0	0	0	0	0	0	0	0	0	0	0	0	0	0	0	0	0	0	0	0	0
d__Bacteria;k__norank_d__Bacteria;p__Bacteroidota;c__Bacteroidia;o__Bacteroidales;f__Prevotellaceae;g__Prevotellaceae_NK3B31_group	0	0	0	0	0	0	0.000397219	0	0	0	0	0	0	0	0.00179103	0	0	0	0	0	0	0	0	0	0	0	0	0	0	0	8.17795e-05	0
d__Bacteria;k__norank_d__Bacteria;p__Bacteroidota;c__Bacteroidia;o__Bacteroidales;f__Prevotellaceae;g__Prevotellaceae_UCG-001	0	0	0	0	0	0	0	0	0	0	0	0	0	0	0	0	0	0	0	0	0	0	0	0	0	0	0	0	0	0	2.72598e-05	0
d__Bacteria;k__norank_d__Bacteria;p__Bacteroidota;c__Bacteroidia;o__Bacteroidales;f__Prevotellaceae;g__norank_f__Prevotellaceae	0	0	0	0	0	0	0	0	0	0	0	0	0	0	0	0	0	0	0	0	0	0	0	0	0	0	0	0	0	0	2.72598e-05	0
d__Bacteria;k__norank_d__Bacteria;p__Bacteroidota;c__Bacteroidia;o__Bacteroidales;f__Prevotellaceae;g__unclassified_f__Prevotellaceae	0	0	0	0.000665624	0	0	3.31016e-05	0	0	0	0	0.000707074	0	0	0.00187769	0	0	0	0	0	0	0	0	0	0	0	0	0	0	0	0	3.15587e-05
d__Bacteria;k__norank_d__Bacteria;p__Bacteroidota;c__Bacteroidia;o__Bacteroidales;f__Rikenellaceae;g__Alistipes	0	0.00147801	0.00125136	0.0168403	0.0274249	0.00541209	0	0.000119023	0	0.001632	0.00026436	0.0176203	0.0192539	0.00259968	0	0.000177719	0.00234677	0	0	0	0.00638782	0.000475859	0.0230537	0.000774066	0.000120486	0	0	0	0.00389527	0	0	0.000315587
d__Bacteria;k__norank_d__Bacteria;p__Bacteroidota;c__Bacteroidia;o__Bacteroidales;f__Tannerellaceae;g__Parabacteroides	0.00636264	0.000160653	0.00933079	0.00219656	0.0104745	0.0380551	0.0232042	0.0292499	0.00636288	0.00192873	0.00230371	0.0122182	0.0025825	0.00239521	0.00141549	0.00403676	0.015185	0.0350588	0.0177657	0.00740099	0.0172267	0.139463	0.0112752	0.0136545	0.00240971	0.00934724	0.00182498	0.00581463	0.000585754	0.00248451	0.000218079	0.00132546
d__Bacteria;k__norank_d__Bacteria;p__Bacteroidota;c__Bacteroidia;o__Bacteroidales;f__unclassified_o__Bacteroidales;g__unclassified_o__Bacteroidales	3.33122e-05	0.000160653	5.4407e-05	0	0.000283096	4.26148e-05	6.62032e-05	0	0	0.00462894	0	0.000141415	0.000401722	0.000262889	0.000693301	0	3.45113e-05	7.32681e-05	3.43631e-05	0	3.39778e-05	7.32091e-05	0	0	0	0	0	0	0	0	0	0
d__Bacteria;k__norank_d__Bacteria;p__Bacteroidota;c__Bacteroidia;o__Chitinophagales;f__Chitinophagaceae;g__Taibaiella	0	0	0	0	0	0	0	0	0	0	0	0	0	2.92099e-05	0	0	0	0	0	0	0	0	0	0	0	0	0	0	0	0	0	0
d__Bacteria;k__norank_d__Bacteria;p__Bacteroidota;c__Bacteroidia;o__Flavobacteriales;f__Crocinitomicaceae;g__Fluviicola	0	3.21306e-05	0	0	0	0	0	0	0	0	0	0	0	0	0	0	0	0	0	0	0	0	0	0	0	0	0	0	0	0	0	0
d__Bacteria;k__norank_d__Bacteria;p__Bacteroidota;c__Bacteroidia;o__Flavobacteriales;f__Flavobacteriaceae;g__Flavobacterium	3.33122e-05	9.63917e-05	2.72035e-05	6.65624e-05	3.5387e-05	0	3.31016e-05	5.95114e-05	0	0	0	5.65659e-05	0	0	0	2.53884e-05	6.90226e-05	0	0	6.66756e-05	3.39778e-05	0.000219627	6.71141e-05	0.000123851	0	3.0849e-05	0	0	0	2.99338e-05	0.000218079	3.15587e-05
d__Bacteria;k__norank_d__Bacteria;p__Bacteroidota;c__Bacteroidia;o__Flavobacteriales;f__Flavobacteriaceae;g__norank_f__Flavobacteriaceae	0	0	0	0	0	0	0	0	0	0	0	0	0	0	0	0	0	0	0	0	0	0	0	9.28879e-05	0	0	0	0	0	0	0	9.46761e-05
d__Bacteria;k__norank_d__Bacteria;p__Bacteroidota;c__Bacteroidia;o__Flavobacteriales;f__Weeksellaceae;g__Chryseobacterium	0	0	0	0	0	0	0	0	0	0	0	0	0	0	0	0	0	0	0	0	0	0	0	0	0	0	0	0	0	0	0	0
d__Bacteria;k__norank_d__Bacteria;p__Bacteroidota;c__Bacteroidia;o__Sphingobacteriales;f__Sphingobacteriaceae;g__Pedobacter	0	0	0	0	0	0	0	0	0	0	0	0	0	0	0	0	0	0	0	0	0	0	6.71141e-05	0	0	0	0	0	0	0	0	0
d__Bacteria;k__norank_d__Bacteria;p__Bacteroidota;c__Bacteroidia;o__Sphingobacteriales;f__Sphingobacteriaceae;g__Sphingobacterium	0	0	0	0	0	0	0	0	0	0	0	0	0	0	0	0	0	0	3.43631e-05	0	0	0	0	0	0	0	0	0	0	0	0	0
d__Bacteria;k__norank_d__Bacteria;p__Bacteroidota;c__Bacteroidia;o__Sphingobacteriales;f__Sphingobacteriaceae;g__unclassified_f__Sphingobacteriaceae	0	0	0	0	0	0	0	0	0	0	0	0	0	0	0	0	0	0	0	0	0	0	0	0	0	0	0	0	0	0	0	0
d__Bacteria;k__norank_d__Bacteria;p__Bdellovibrionota;c__Bdellovibrionia;o__Bdellovibrionales;f__Bdellovibrionaceae;g__Bdellovibrio	0	0	0	0	0	0	3.31016e-05	0	0	0	0	0	0	0	0	0	0	0	0	0	0	0	0	0	0	0	0	0	0	0	0	0
d__Bacteria;k__norank_d__Bacteria;p__Campilobacterota;c__Campylobacteria;o__Campylobacterales;f__Campylobacteraceae;g__Campylobacter	0	0	0	0	0	0	0	0	0	0	0	0	0	0	0	0	0	0	0	0	0	0	0	0	0	0	0	0	0	0	0	0
d__Bacteria;k__norank_d__Bacteria;p__Campilobacterota;c__Campylobacteria;o__Campylobacterales;f__Helicobacteraceae;g__Helicobacter	0	0	0	0	0	0	0	0	0	0	0	0	0	0	2.88875e-05	0	0	0	0	0	0	0	0	0	0	0	0	0	0	5.98677e-05	0	0
d__Bacteria;k__norank_d__Bacteria;p__Cyanobacteria;c__Cyanobacteriia;o__Chloroplast;f__norank_o__Chloroplast;g__norank_f__norank_o__Chloroplast	0	0	0	0	0	0	0	0	0	0	0	0	0	0	0	0	0	0	0	0	0	0	0	0	0	0	0	0	0	0	0	0
d__Bacteria;k__norank_d__Bacteria;p__Cyanobacteria;c__Vampirivibrionia;o__Gastranaerophilales;f__norank_o__Gastranaerophilales;g__norank_f__norank_o__Gastranaerophilales	0	0	0	0	0	0	0	0	0	0	0	0	0	0	0	0	0	0	0	0	6.79556e-05	0	0	0	0	0	0	0	2.92877e-05	0	0	0
d__Bacteria;k__norank_d__Bacteria;p__Desulfobacterota;c__Desulfovibrionia;o__Desulfovibrionales;f__Desulfovibrionaceae;g__Bilophila	0.00393084	0.0431514	0.00495103	0.00515858	0.00421105	0.00473025	0.00483284	0.00479067	0.000289222	0.0006528	0.00026436	0.000905054	0.000143472	0.000204469	0.000144438	0.000126942	0.00165654	0	0.000962166	0.00633418	0.00822262	0.00373367	0.00731544	3.09626e-05	0.000481942	0	0	0.000467508	0.00026359	5.98677e-05	0.000408898	3.15587e-05
d__Bacteria;k__norank_d__Bacteria;p__Desulfobacterota;c__Desulfovibrionia;o__Desulfovibrionales;f__Desulfovibrionaceae;g__Desulfovibrio	0	6.42612e-05	0.000163221	0.0161081	0.02332	0.00353703	0	0.00124974	0	0.00106822	0	0.00384648	8.60832e-05	0.000642617	5.77751e-05	0.000203108	0.0070058	0	0.0015807	0	0	0	0.000369128	9.28879e-05	0.000271093	0	3.04164e-05	0	0	0.000119735	0.00122669	0.000252469
d__Bacteria;k__norank_d__Bacteria;p__Desulfobacterota;c__Desulfovibrionia;o__Desulfovibrionales;f__Desulfovibrionaceae;g__Mailhella	0	0	0	6.65624e-05	0	0	0	0	0	0	0	0.000848488	0	0	0	0	0	0	0	0	0	0	3.3557e-05	3.09626e-05	0	0	0	0	0	0	8.17795e-05	6.31174e-05
d__Bacteria;k__norank_d__Bacteria;p__Desulfobacterota;c__Desulfovibrionia;o__Desulfovibrionales;f__Desulfovibrionaceae;g__norank_f__Desulfovibrionaceae	0	0	0	0	0	0	0	0	0	0	0	0	0	0	0	0	3.45113e-05	0	0	0	0	0	0	0	0	0	0	0	0	0	0	0
d__Bacteria;k__norank_d__Bacteria;p__Desulfobacterota;c__Desulfovibrionia;o__Desulfovibrionales;f__Desulfovibrionaceae;g__unclassified_f__Desulfovibrionaceae	0.000199873	0.00584777	0.00174102	0.00166406	0.00106161	0.00204551	0.00135717	0.000446336	0	0	0	8.48488e-05	2.86944e-05	0	0	0	0.000138045	0	0.000309268	0.00193359	0.00326187	0.000439255	0.00107383	0	9.03642e-05	0	0	0	0.000322165	0	0	0
d__Bacteria;k__norank_d__Bacteria;p__Firmicutes;c__Bacilli;o__Bacillales;f__Bacillaceae;g__Anoxybacillus	0	0	0	0	0	0	0	0	0	0	0	0	0	0	0	0	0	0	0	0	0	0	0	0	0	0	0	0	0	0	0	0
d__Bacteria;k__norank_d__Bacteria;p__Firmicutes;c__Bacilli;o__Bacillales;f__Bacillaceae;g__Bacillus	0	0	0	3.32812e-05	0	0	0	0	0	0	0	0	0	0	0	0	0	0	0	0	0	0	0	0	0	0	0	0	0	0	0	0
d__Bacteria;k__norank_d__Bacteria;p__Firmicutes;c__Bacilli;o__Erysipelotrichales;f__Erysipelatoclostridiaceae;g__Candidatus_Stoquefichus	6.66245e-05	0	0	0	3.5387e-05	0	0	0	0.000128543	0	0	0	5.73888e-05	0	0	0	0	0	0	0	0	0	0	0	0	0	0	0	0	0	0	0
d__Bacteria;k__norank_d__Bacteria;p__Firmicutes;c__Bacilli;o__Erysipelotrichales;f__Erysipelatoclostridiaceae;g__Catenibacterium	0	0	0	0	0	0	0	0	0	0	0	0	0	0	0	0	0.00210519	0	0	0	0	0	0	0	0.00105425	0	0	0	0	0	0	0
d__Bacteria;k__norank_d__Bacteria;p__Firmicutes;c__Bacilli;o__Erysipelotrichales;f__Erysipelatoclostridiaceae;g__Coprobacillus	3.33122e-05	0	0	0	0	0	6.62032e-05	2.97557e-05	0	0	0	0	0	0	2.88875e-05	0	0	0	0	0	0	0	0	0	0	0	0	0	0	0	0	0
d__Bacteria;k__norank_d__Bacteria;p__Firmicutes;c__Bacilli;o__Erysipelotrichales;f__Erysipelatoclostridiaceae;g__Erysipelatoclostridium	0.000133249	0.00125309	2.72035e-05	0.000499218	0	0.000127845	0.000860642	0.000386824	0.0004499	0.000237382	3.77658e-05	5.65659e-05	2.86944e-05	0	0	0	0.000448647	0.00117229	0.00103089	0.000333378	0	0	0.000302013	0	0	0.000123396	0	2.92193e-05	0	0	0.000163559	0
d__Bacteria;k__norank_d__Bacteria;p__Firmicutes;c__Bacilli;o__Erysipelotrichales;f__Erysipelatoclostridiaceae;g__Erysipelotrichaceae_UCG-003	0.000199873	0	2.72035e-05	0.00276234	0.000389257	0.000596608	0.000662032	0.00062487	3.21357e-05	0	3.77658e-05	0.00412931	0.00071736	2.92099e-05	0	0	0	0.00205151	0	0	0.000543644	0.000183023	0.00332215	0.000123851	0	0.000493583	0	0	0.00038074	2.99338e-05	0.00239887	3.15587e-05
d__Bacteria;k__norank_d__Bacteria;p__Firmicutes;c__Bacilli;o__Erysipelotrichales;f__Erysipelatoclostridiaceae;g__unclassified_f__Erysipelatoclostridiaceae	0	0	0	0	3.5387e-05	0	0	0	0	0	0	0	2.86944e-05	0	0	0	0	0	0	0	0	0	0	0	0	0	0	0	0	0	0	0
d__Bacteria;k__norank_d__Bacteria;p__Firmicutes;c__Bacilli;o__Erysipelotrichales;f__Erysipelotrichaceae;g__Allobaculum	3.33122e-05	0.000674742	0	0	0	0	0	0	0	2.96727e-05	0	0	0	0	0	0	0	0	0	0	0	0	0	0.000619253	0	0	0	0	0	0	0	6.31174e-05
d__Bacteria;k__norank_d__Bacteria;p__Firmicutes;c__Bacilli;o__Erysipelotrichales;f__Erysipelotrichaceae;g__Clostridium_innocuum_group	0.000433059	0.00125309	0.000217628	0.00026625	0.000247709	0	0.000430321	8.92671e-05	0.000128543	0.000118691	3.77658e-05	0.000197981	8.60832e-05	0	0	0	0	0.000696047	0	0.000166689	0	0	0	0	0	0.000185094	0	0	0	0	5.45197e-05	0
d__Bacteria;k__norank_d__Bacteria;p__Firmicutes;c__Bacilli;o__Erysipelotrichales;f__Erysipelotrichaceae;g__Dielma	0	0	0	3.32812e-05	0	0	0	0	0	0	0	0	0	0	0	0	0	0	0	0	0	0	0	0	0	0	0	0	0	0	0	0
d__Bacteria;k__norank_d__Bacteria;p__Firmicutes;c__Bacilli;o__Erysipelotrichales;f__Erysipelotrichaceae;g__Dubosiella	0	0	0	0	0	0	0	0	0	0	0	0	2.86944e-05	0	2.88875e-05	0	0	0	0	0	0	0	0	0	0	0	0	0	8.78632e-05	2.99338e-05	0	0
d__Bacteria;k__norank_d__Bacteria;p__Firmicutes;c__Bacilli;o__Erysipelotrichales;f__Erysipelotrichaceae;g__Faecalitalea	0.000233186	0.000128522	0.000163221	0	0	0	0	0	0.000128543	0	0.000226595	0	0	0	0	0	0	0	0	6.66756e-05	0	0	0	0.000247701	0	0	0	0	0	0	0	0
d__Bacteria;k__norank_d__Bacteria;p__Firmicutes;c__Bacilli;o__Erysipelotrichales;f__Erysipelotrichaceae;g__Holdemanella	0	0	0	0.00842014	0	0.013722	0.0137041	0.00175559	0	0	0	0.0272082	0	0.004732	0.00173325	0.000583934	0.0021397	0	0	0	0.000509667	0	0.00244966	0	3.01214e-05	0	0	0	2.92877e-05	0	0.000954094	0
d__Bacteria;k__norank_d__Bacteria;p__Firmicutes;c__Bacilli;o__Erysipelotrichales;f__Erysipelotrichaceae;g__Holdemania	9.99367e-05	0.00054622	0.000163221	0.000166406	0.000247709	0.000468763	0.000264813	0	0	0	7.55316e-05	0.000254546	0.000114778	0	0	0	0.000103534	0.000696047	0	0.000266702	0.000135911	0	0.000503356	0	0	6.16979e-05	0	0	0	0	0	0
d__Bacteria;k__norank_d__Bacteria;p__Firmicutes;c__Bacilli;o__Erysipelotrichales;f__Erysipelotrichaceae;g__Solobacterium	0	0	0	0	0	0	0	0	0	0	0	0	0	0	0	0	3.45113e-05	0	0	6.66756e-05	0	0	0	0	0	0	0	0	2.92877e-05	0	0	0
d__Bacteria;k__norank_d__Bacteria;p__Firmicutes;c__Bacilli;o__Erysipelotrichales;f__Erysipelotrichaceae;g__Turicibacter	0.00319797	0.000160653	8.16104e-05	3.32812e-05	7.07739e-05	4.26148e-05	0.000662032	0.000446336	0.000964072	5.93454e-05	3.77658e-05	2.82829e-05	2.86944e-05	0	0.00011555	7.61653e-05	6.90226e-05	0.000293072	0	0	6.79556e-05	0	0.000939597	0.00058829	0	0.000215943	0	0	0	0	0.000599716	0.000126235
d__Bacteria;k__norank_d__Bacteria;p__Firmicutes;c__Bacilli;o__Erysipelotrichales;f__Erysipelotrichaceae;g__norank_f__Erysipelotrichaceae	0	0	0	0	0	8.52297e-05	0	0	0	0	0	0	0	0	0	0	0	0	3.43631e-05	0	0	7.32091e-05	0	0	0	0	0	0	2.92877e-05	0	0	0
d__Bacteria;k__norank_d__Bacteria;p__Firmicutes;c__Bacilli;o__Exiguobacterales;f__Exiguobacteraceae;g__Exiguobacterium	0	0	0	0	0	0	0	0	0	0	0	0	0	0	0	0	0	0	0	0	0	0	3.3557e-05	0	0	0	0	0	0	0	0	0
d__Bacteria;k__norank_d__Bacteria;p__Firmicutes;c__Bacilli;o__Izemoplasmatales;f__norank_o__Izemoplasmatales;g__norank_f__norank_o__Izemoplasmatales	0	0	0	0	0	0	0	0	0	0	0	0	0	0	0	0	0	0	0	0	0.000101933	0	0	0	0	0	0	0	0	0	0	0
d__Bacteria;k__norank_d__Bacteria;p__Firmicutes;c__Bacilli;o__Lactobacillales;f__Aerococcaceae;g__Aerococcus	0	0	0	0	0.000176935	0	0	0	0	0	0	0	0	0	0	0	0	0	0	0	0	0	0	0	0	0	0	0	0	0	0	0
d__Bacteria;k__norank_d__Bacteria;p__Firmicutes;c__Bacilli;o__Lactobacillales;f__Carnobacteriaceae;g__Granulicatella	0	0	0	0	0	0	3.31016e-05	0	0	0	0	0	2.86944e-05	0	0	0	0	0	0	6.66756e-05	3.39778e-05	0	0	0	0	0	0	0	0	0	0	0
d__Bacteria;k__norank_d__Bacteria;p__Firmicutes;c__Bacilli;o__Lactobacillales;f__Enterococcaceae;g__Enterococcus	0.00692895	0.000835395	0.000462459	0.000232968	0.0148625	0.00166198	0.00427011	0.00330288	0.0049489	0.000919854	3.77658e-05	0.000141415	0.0666571	0.000613407	0	0.000253884	0.0101118	0.00241785	0.00463902	0.00263368	0.00812069	0.0661444	3.3557e-05	0.01158	0	0	0	0.000321412	0.00424672	0	0	3.15587e-05
d__Bacteria;k__norank_d__Bacteria;p__Firmicutes;c__Bacilli;o__Lactobacillales;f__Lactobacillaceae;g__Lactobacillus	0	0	5.4407e-05	0	0	0	0	5.95114e-05	3.21357e-05	0.0156672	0.00351222	0.000113132	0.000200861	0.000204469	0.00615305	0.00291967	0.00955964	0	0	0.0152354	0.0446808	0	0.0358054	0	0.0120486	0	0	0.0934432	0.0407099	8.98015e-05	0.108658	0
d__Bacteria;k__norank_d__Bacteria;p__Firmicutes;c__Bacilli;o__Lactobacillales;f__Lactobacillaceae;g__Pediococcus	0	0	0	0	0	0	0	0	0	0.000593454	0	0.00138586	0	0	0	7.61653e-05	0	0	0	0	0	0	0	0	0	0	0	0	0	0	0	0
d__Bacteria;k__norank_d__Bacteria;p__Firmicutes;c__Bacilli;o__Lactobacillales;f__Leuconostocaceae;g__Leuconostoc	0	0	0	0	3.5387e-05	0	0	0	0	0	0	0	0	0.000321309	0	0	0	0	0	0	0	0	0	0	0	0	0	0	0	0	0	0
d__Bacteria;k__norank_d__Bacteria;p__Firmicutes;c__Bacilli;o__Lactobacillales;f__Leuconostocaceae;g__Weissella	0	0	0	0	7.07739e-05	0	0	0	0	0.000474763	0.000113297	0	0.000172166	0.0137286	0	0	0	0	0	0	0	0	0	3.09626e-05	0	0	0	0	0	0	0	0.00072585
d__Bacteria;k__norank_d__Bacteria;p__Firmicutes;c__Bacilli;o__Lactobacillales;f__Streptococcaceae;g__Lactococcus	0.387488	0	0	0.000199687	0.00396334	0.0104406	0	0	0.392602	0	0	0.000254546	0.0231277	2.92099e-05	0	0	0	0	0	0	0	0	0	9.28879e-05	0	0	0	0	0	0	0	0
d__Bacteria;k__norank_d__Bacteria;p__Firmicutes;c__Bacilli;o__Lactobacillales;f__Streptococcaceae;g__Streptococcus	9.99367e-05	0.000160653	0.00432535	0.000332812	3.5387e-05	0.000213074	0.00628931	0.00669503	0.000160679	0.0003264	0.0110276	0.000113132	0.00131994	0.000146049	5.77751e-05	0.000152331	0.000103534	0.0256805	3.43631e-05	0.020236	0.00475689	3.66046e-05	0.0126846	0.000433477	0	0.00370188	0	0.0366117	0.0542116	0	0.00392542	0.000126235
d__Bacteria;k__norank_d__Bacteria;p__Firmicutes;c__Bacilli;o__Lactobacillales;f__Streptococcaceae;g__unclassified_f__Streptococcaceae	0	0	0	0	0	0	6.62032e-05	0	0	0	0	0	0.000172166	0	0	0	0	3.66341e-05	0	0.000166689	6.79556e-05	0	0	3.09626e-05	0	0	0	0	0.000205014	0	0	0
d__Bacteria;k__norank_d__Bacteria;p__Firmicutes;c__Bacilli;o__Lactobacillales;f__unclassified_o__Lactobacillales;g__unclassified_o__Lactobacillales	0.00249842	0	0	0	0.000247709	8.52297e-05	0	0	0.00205669	0	0	0	0.00215208	0	0	0	3.45113e-05	0	0	0.000233364	0	0	0.000100671	0	0	0	0	0.00274661	0.00064433	0	0	0
d__Bacteria;k__norank_d__Bacteria;p__Firmicutes;c__Bacilli;o__RF39;f__norank_o__RF39;g__norank_f__norank_o__RF39	0	0	0	6.65624e-05	0	0	0.000231711	0	0	0	0	0.000141415	0	0	0	0	0	0	0	0	0.00156298	0	0	3.09626e-05	0	0	0	0	0.000439316	0	0	0
d__Bacteria;k__norank_d__Bacteria;p__Firmicutes;c__Bacilli;o__Staphylococcales;f__Gemellaceae;g__Gemella	0	0	0	3.32812e-05	0	0	0	0	0	0	0	0	0	0	0	0	0	0	0	0	0	0	0	0	0	0	0	0	0	0	0	0
d__Bacteria;k__norank_d__Bacteria;p__Firmicutes;c__Bacilli;o__unclassified_c__Bacilli;f__unclassified_c__Bacilli;g__unclassified_c__Bacilli	0	0	0	0	0	0	0	0	0	0	0	0	0	0	0	0	0	0	0	0	0	0	0	0	0	0	0	0	0	0	0	0
d__Bacteria;k__norank_d__Bacteria;p__Firmicutes;c__Clostridia;o__Christensenellales;f__Christensenellaceae;g__Christensenella	0	0.000160653	5.4407e-05	9.98436e-05	0	0	3.31016e-05	0	0	0	0	2.82829e-05	0	0	0	0	3.45113e-05	0	0	0	0	0	0	0	0	0	0	0	0	0	2.72598e-05	0
d__Bacteria;k__norank_d__Bacteria;p__Firmicutes;c__Clostridia;o__Christensenellales;f__Christensenellaceae;g__Christensenellaceae_R-7_group	0	0	0	0.00056578	0.00127393	0.000170459	0.00148957	0	0	8.90181e-05	3.77658e-05	0.000226264	0.000401722	8.76296e-05	0.000317763	0	0	0	0	0	0.000713533	0	0.000402685	3.09626e-05	0	0	0	0	0.000351453	0	0.000354378	0
d__Bacteria;k__norank_d__Bacteria;p__Firmicutes;c__Clostridia;o__Christensenellales;f__Christensenellaceae;g__norank_f__Christensenellaceae	0	0	0	0	7.07739e-05	0	0	0	0	0	0	0	0	0	0	0	0	0	0	0	0	0	0	0	0	0	0	0	0	0	0	0
d__Bacteria;k__norank_d__Bacteria;p__Firmicutes;c__Clostridia;o__Clostridia_UCG-014;f__norank_o__Clostridia_UCG-014;g__norank_f__norank_o__Clostridia_UCG-014	0	0	0	0.000998436	0	0.00110799	0.00268123	5.95114e-05	0	0	0	0.000905054	0	2.92099e-05	0.00011555	0	0	0	0	0	0.0607523	0	0.00134228	0	0	0	0	0	0.0294634	0	0.00397994	0
d__Bacteria;k__norank_d__Bacteria;p__Firmicutes;c__Clostridia;o__Clostridia_vadinBB60_group;f__norank_o__Clostridia_vadinBB60_group;g__norank_f__norank_o__Clostridia_vadinBB60_group	0	0	0	0	0	0	0	0	0	0	0	8.48488e-05	0	0	0	0	0	0	0	0	0.0009174	0	0	0	0	0	0	0	0	0	0	0
d__Bacteria;k__norank_d__Bacteria;p__Firmicutes;c__Clostridia;o__Clostridiales;f__Clostridiaceae;g__Clostridium_sensu_stricto_1	0.0101602	0.00151014	5.4407e-05	6.65624e-05	0.131038	0.00387795	0.0040053	0.00993841	0.0192493	0.000296727	0.00128404	5.65659e-05	0.231277	0.00432306	0.000173325	0.00225957	0	0.0165952	0.00360812	0.00226697	0.00210662	0	0.0252013	0.00377744	0	0.00114141	0.0136265	0.00619448	0.0769681	0	0.0160015	0.00104144
d__Bacteria;k__norank_d__Bacteria;p__Firmicutes;c__Clostridia;o__Clostridiales;f__Clostridiaceae;g__Proteiniclasticum	0	0	0	0	0	0	0	0	0	0	0	2.82829e-05	0	0	0	0	0	0	0	0	0	0	0	0	0	0	0	0	0	0	0	0
d__Bacteria;k__norank_d__Bacteria;p__Firmicutes;c__Clostridia;o__Eubacteriales;f__Anaerofustaceae;g__Anaerofustis	0	3.21306e-05	0	0	0	0	0	0	0	5.93454e-05	0	0.000113132	0	0	0	0	0	0	0	0	0	0	3.3557e-05	0	0	0	0	0	0	0	0	0
d__Bacteria;k__norank_d__Bacteria;p__Firmicutes;c__Clostridia;o__Eubacteriales;f__Eubacteriaceae;g__Eubacterium	0	0.00722938	0.000571273	0	0.000106161	0	0	0	0	0.000207709	0	0	0.000143472	0	0	0	0	0	0.000103089	0	0	0.000512464	0	9.28879e-05	0	0	0	0	0	2.99338e-05	0	0
d__Bacteria;k__norank_d__Bacteria;p__Firmicutes;c__Clostridia;o__Eubacteriales;f__Eubacteriaceae;g__norank_f__Eubacteriaceae	0	0	0	0	0	0	0	0	0	0	0	0	0	0	2.88875e-05	5.07769e-05	0	0	0	0	0	0	0	0	0	0	0	0	0	0	0	0
d__Bacteria;k__norank_d__Bacteria;p__Firmicutes;c__Clostridia;o__Lachnospirales;f__Defluviitaleaceae;g__Defluviitaleaceae_UCG-011	0	0	0	3.32812e-05	0.00145087	0	3.31016e-05	0	0	0	0	0.000141415	0.000200861	0	0	0	0	0	0	0	0.000101933	0	0.000100671	0	0	0	0	0	0	0	0	0
d__Bacteria;k__norank_d__Bacteria;p__Firmicutes;c__Clostridia;o__Lachnospirales;f__Lachnospiraceae;g__Agathobacter	0.000666245	0.000963917	0	0.00213	0.00300789	0.000170459	0.00377358	0.000148779	0.000899801	0.0418682	0.00071755	0.0245496	0.000487805	2.92099e-05	0.0016177	0.000558546	0	0.00208814	0	0.000100013	0.000679556	0	0.000469799	0	0	0.0218411	0	0	0.000234302	0	0.00207175	0.000157793
d__Bacteria;k__norank_d__Bacteria;p__Firmicutes;c__Clostridia;o__Lachnospirales;f__Lachnospiraceae;g__Anaerostignum	0	0	0	3.32812e-05	0	0	0	0	0	2.96727e-05	0	0	0	0	0	0	0	0	0	0	0	0	0	0	0	0	0	0	0	0	0	0
d__Bacteria;k__norank_d__Bacteria;p__Firmicutes;c__Clostridia;o__Lachnospirales;f__Lachnospiraceae;g__Anaerostipes	0	0.0106674	0.000163221	0	0.000106161	8.52297e-05	9.93049e-05	0.00196388	0.000321357	0.00842705	0.000415424	0.000282829	2.86944e-05	8.76296e-05	2.88875e-05	0.000253884	0	0.000329707	0	0.00243366	0.000135911	0	0.0118121	0	0	0.00182009	0	0.000175316	2.92877e-05	0	0.00267146	0
d__Bacteria;k__norank_d__Bacteria;p__Firmicutes;c__Clostridia;o__Lachnospirales;f__Lachnospiraceae;g__Blautia	0.00156568	0.0218809	0.00682807	0.0277565	0.0062281	0.00289781	0.00307845	0.00836135	0.00369561	0.0131153	0.00906379	0.0391153	0.00728838	0.00128523	0.00245544	0.00523002	0.000586692	0.00146536	0.00721625	0.0245366	0.00601407	0.000549068	0.0621477	0.000371552	6.02428e-05	0.00397952	0.000273748	0.0150187	0.00451031	0.000179603	0.0220805	0.000631174
d__Bacteria;k__norank_d__Bacteria;p__Firmicutes;c__Clostridia;o__Lachnospirales;f__Lachnospiraceae;g__Catenibacillus	0	0	0	0.000133125	0	0	0	0	0	0	0	0.000113132	0	0	0	0	0	0	0	0	0	0	0	0	0	0	0	0	0	0	0	0
d__Bacteria;k__norank_d__Bacteria;p__Firmicutes;c__Clostridia;o__Lachnospirales;f__Lachnospiraceae;g__Cellulosilyticum	0	0	0	0	0	0	0	0	0	0	0	0	0	0	0	0	0	0	0	0	0	0	0	0	0	0	0	0	0	0	0	0
d__Bacteria;k__norank_d__Bacteria;p__Firmicutes;c__Clostridia;o__Lachnospirales;f__Lachnospiraceae;g__Coprococcus	0	0.000739003	0	0.001065	0.00138009	0.00127845	0.00278054	5.95114e-05	0	0.00415418	3.77658e-05	0.000509093	0.000114778	8.76296e-05	0.000982176	0	0	0	0	0	0	0	3.3557e-05	0	0	0	0	0	0	0	0.000109039	3.15587e-05
d__Bacteria;k__norank_d__Bacteria;p__Firmicutes;c__Clostridia;o__Lachnospirales;f__Lachnospiraceae;g__Dorea	0.000199873	0.0326768	0.00837867	0.0140447	0.0130224	0.00963096	0.0154585	0.0505252	0.000578443	0.00124625	0.000679784	0.0342789	0.0115638	0.000321309	0.000722189	0.000787042	0.00227775	0.0164853	0.00216487	0.0042339	0.0105671	3.66046e-05	0.0247651	6.19253e-05	0	0.000401037	3.04164e-05	0	0.00351453	0	0.0116127	0.000378704
d__Bacteria;k__norank_d__Bacteria;p__Firmicutes;c__Clostridia;o__Lachnospirales;f__Lachnospiraceae;g__Eubacterium_eligens_group	0.000133249	0.00379141	0	0.00129797	0.00548498	0.00417626	0.00225091	0	0.000192814	0.00255185	0	0.00104647	0.000430416	0.00122681	0.000317763	5.07769e-05	0	0.001502	0	0	0.00818864	0	0	0	0	0.012247	0	0	0.00155225	0	0	0
d__Bacteria;k__norank_d__Bacteria;p__Firmicutes;c__Clostridia;o__Lachnospirales;f__Lachnospiraceae;g__Eubacterium_hallii_group	6.66245e-05	0	5.4407e-05	0.00216328	0.00148625	0.000127845	0.000728236	0.0018151	0.000160679	0	0.000302126	0.00254546	0.00783357	5.84197e-05	0.0002311	0.000253884	6.90226e-05	0.000439609	0	0.00333378	0.000203867	0	0.0047651	0	0	0.00240622	0	0.000730482	0	0	0.00149929	0
d__Bacteria;k__norank_d__Bacteria;p__Firmicutes;c__Clostridia;o__Lachnospirales;f__Lachnospiraceae;g__Eubacterium_ruminantium_group	0	3.21306e-05	0	0.000199687	0	0	0	0	0	0.000830836	0	0.0026586	0	0	8.66626e-05	0	0	0	0	0	0.000135911	0	6.71141e-05	0	0	0	0	0	2.92877e-05	0	0	0
d__Bacteria;k__norank_d__Bacteria;p__Firmicutes;c__Clostridia;o__Lachnospirales;f__Lachnospiraceae;g__Eubacterium_ventriosum_group	0	3.21306e-05	0	0.00026625	7.07739e-05	8.52297e-05	6.62032e-05	0	0	0.000178036	0.000188829	0.00096162	2.86944e-05	2.92099e-05	2.88875e-05	0	0	0.000146536	0	3.33378e-05	0	0	3.3557e-05	0	0	0.00243707	0	0	0	0	0	0
d__Bacteria;k__norank_d__Bacteria;p__Firmicutes;c__Clostridia;o__Lachnospirales;f__Lachnospiraceae;g__Eubacterium_xylanophilum_group	0	0	0	0	0	0	0	0	0	0	0	0.00048081	0	0	0	0	0	0	0	0	0	0	0.000134228	0	0	0	0	0	0	0	0.000136299	0
d__Bacteria;k__norank_d__Bacteria;p__Firmicutes;c__Clostridia;o__Lachnospirales;f__Lachnospiraceae;g__Frisingicoccus	0	0	0	0	0	0	0	0	0	0	0	8.48488e-05	0	0	0	0	0	0	0	0	0	0	0	0	0	0	0	0	0	0	0	0
d__Bacteria;k__norank_d__Bacteria;p__Firmicutes;c__Clostridia;o__Lachnospirales;f__Lachnospiraceae;g__Fusicatenibacter	0.000166561	0.00809691	0	0.00921889	0.00145087	0.000127845	0.000397219	0.000446336	0.00147824	0.000712145	0.00026436	0.0394547	0.00180775	0.000379728	0.000548863	0.000203108	0	0.00139209	0	0.000100013	0.000203867	0	0.0038255	0	0	0.00256046	0	5.84385e-05	2.92877e-05	0	0.00294406	6.31174e-05
d__Bacteria;k__norank_d__Bacteria;p__Firmicutes;c__Clostridia;o__Lachnospirales;f__Lachnospiraceae;g__GCA-900066575	0	3.21306e-05	2.72035e-05	3.32812e-05	0.000176935	0	0	0	0	2.96727e-05	0	2.82829e-05	0.000114778	2.92099e-05	0	0	0	0	0	0	0	0	0	0	0	0	0	0	0	0	0	0
d__Bacteria;k__norank_d__Bacteria;p__Firmicutes;c__Clostridia;o__Lachnospirales;f__Lachnospiraceae;g__Lachnoanaerobaculum	0	0	0	0	0	0	0	0	0	0	0	0	0	0	0	0	0	0	0	0	0	0	0	0	0	0	0	0	0	0	0	0
d__Bacteria;k__norank_d__Bacteria;p__Firmicutes;c__Clostridia;o__Lachnospirales;f__Lachnospiraceae;g__Lachnoclostridium	0.000632932	0.0190534	0.000707291	0.0104836	0.0019109	4.26148e-05	0.000297915	2.97557e-05	0.000353493	0.00237382	0.000793081	0.00260203	5.73888e-05	2.92099e-05	0.000433313	0.000787042	0.000103534	0	0.000309268	6.66756e-05	6.79556e-05	3.66046e-05	0.000234899	6.19253e-05	0	0.00120311	0	0.000146096	0	0	8.17795e-05	0.000189352
d__Bacteria;k__norank_d__Bacteria;p__Firmicutes;c__Clostridia;o__Lachnospirales;f__Lachnospiraceae;g__Lachnospira	0.000499684	0.00321306	8.16104e-05	0.000765467	0.00187551	0.000213074	0.000397219	0.000119023	0.00212096	0.00462894	0.00026436	0.00166869	0.000114778	0.000408938	0.000462201	0.000406215	0	3.66341e-05	0	0.00120016	0.000883422	3.66046e-05	0	0	0	0.00376357	0	0.00149018	0.000146439	0	2.72598e-05	0
d__Bacteria;k__norank_d__Bacteria;p__Firmicutes;c__Clostridia;o__Lachnospirales;f__Lachnospiraceae;g__Lachnospiraceae_FCS020_group	0	9.63917e-05	2.72035e-05	3.32812e-05	0.000247709	0	0	0.000238046	0	2.96727e-05	0	0.000169698	0.000200861	5.84197e-05	0	2.53884e-05	0	3.66341e-05	0	0	6.79556e-05	0	0.00325503	0	0	6.16979e-05	0	0	0	0	0.00179915	0
d__Bacteria;k__norank_d__Bacteria;p__Firmicutes;c__Clostridia;o__Lachnospirales;f__Lachnospiraceae;g__Lachnospiraceae_NC2004_group	0	0	0	0	0	0	0	0	0	0.0013056	0	0.000197981	0	0	0	0	0	0	0	0	0	0	0	0	0	0.000832922	0	0	0	0	0	0
d__Bacteria;k__norank_d__Bacteria;p__Firmicutes;c__Clostridia;o__Lachnospirales;f__Lachnospiraceae;g__Lachnospiraceae_ND3007_group	9.99367e-05	0	0	0.000532499	0	8.52297e-05	0	0.000267801	0.000417765	0	0	0.00158384	0.000229555	8.76296e-05	2.88875e-05	0.000101554	0	0.000402975	0	0.00106681	0.000135911	0	0.000234899	3.09626e-05	0	0.000956318	0	0.00102267	2.92877e-05	0	0.00149929	0
d__Bacteria;k__norank_d__Bacteria;p__Firmicutes;c__Clostridia;o__Lachnospirales;f__Lachnospiraceae;g__Lachnospiraceae_NK4A136_group	3.33122e-05	0.000128522	0	0.000133125	0.00184012	0.00106537	0.000993049	5.95114e-05	0	0.000385745	0	0.000820205	0.000229555	2.92099e-05	0.000288875	5.07769e-05	3.45113e-05	0.0016119	0	0.00383384	0.00299004	0	0.000134228	0	0	0.00407206	0	0.000993455	0	0	0.000681496	0
d__Bacteria;k__norank_d__Bacteria;p__Firmicutes;c__Clostridia;o__Lachnospirales;f__Lachnospiraceae;g__Lachnospiraceae_UCG-001	0	0	0	0	0	0	0	0	0	0.0003264	3.77658e-05	5.65659e-05	0	0	0	0	0	0	0	0	0	0	0.000402685	0	0	0.001635	0	0	0	0	0.000817795	0
d__Bacteria;k__norank_d__Bacteria;p__Firmicutes;c__Clostridia;o__Lachnospirales;f__Lachnospiraceae;g__Lachnospiraceae_UCG-003	0	0	0	3.32812e-05	7.07739e-05	0	0	0	0	0	0	0.000509093	0	0	0	0	0	0	0	0	0	0	0	0	0	0	0	0	0	0	0	0
d__Bacteria;k__norank_d__Bacteria;p__Firmicutes;c__Clostridia;o__Lachnospirales;f__Lachnospiraceae;g__Lachnospiraceae_UCG-004	0	0.000160653	0	0	0	0.0116339	0	0	0	5.93454e-05	7.55316e-05	0.000820205	0	2.92099e-05	0.000144438	0.000253884	0	7.32681e-05	0	0	0	0	3.3557e-05	0	0	0.00286895	0	0	0	0	2.72598e-05	3.15587e-05
d__Bacteria;k__norank_d__Bacteria;p__Firmicutes;c__Clostridia;o__Lachnospirales;f__Lachnospiraceae;g__Lachnospiraceae_UCG-010	3.33122e-05	0	0	0	0	0	0	0	3.21357e-05	0	0	0	8.60832e-05	0	0	0	0	0	0	0	0	0	3.3557e-05	0	0	0	0	0	0	0	2.72598e-05	0
d__Bacteria;k__norank_d__Bacteria;p__Firmicutes;c__Clostridia;o__Lachnospirales;f__Lachnospiraceae;g__Marvinbryantia	0	0	0	0.000133125	0.000141548	0	0	8.92671e-05	0	0	0	0.000339395	5.73888e-05	0	2.88875e-05	0	0	0	0	0	3.39778e-05	0	6.71141e-05	0	0	0	0	0	0	0	5.45197e-05	3.15587e-05
d__Bacteria;k__norank_d__Bacteria;p__Firmicutes;c__Clostridia;o__Lachnospirales;f__Lachnospiraceae;g__Moryella	0	0	0	0	0.000389257	4.26148e-05	0	0	0	0	0	0	0	0	0	0	0	0	0	0	0	0	0	0	0	0	0	0	0	0	0	0
d__Bacteria;k__norank_d__Bacteria;p__Firmicutes;c__Clostridia;o__Lachnospirales;f__Lachnospiraceae;g__Oribacterium	0	0	0	0	0	0	0	0	0	0	0	0	0	0	0	0	0	0	0	0	0	0	0	0	0	0	0	0	0	0	0	0
d__Bacteria;k__norank_d__Bacteria;p__Firmicutes;c__Clostridia;o__Lachnospirales;f__Lachnospiraceae;g__Roseburia	0	6.42612e-05	0	0.00166406	0.00046003	0.000255689	0	0	0.000417765	0.00281891	7.55316e-05	0.00543032	5.73888e-05	5.84197e-05	0.000288875	0	0	3.66341e-05	0	6.66756e-05	6.79556e-05	0	0.000536913	0	0	0.00345508	0	0.000116877	0	0	0.000517937	3.15587e-05
d__Bacteria;k__norank_d__Bacteria;p__Firmicutes;c__Clostridia;o__Lachnospirales;f__Lachnospiraceae;g__Ruminococcus_gauvreauii_group	3.33122e-05	0.000128522	2.72035e-05	0	0	0	0	0	0	0	0	0	0	0	0	0	0	0	0	0	0	0	0	0	0	0	0	0	0	0	0	0
d__Bacteria;k__norank_d__Bacteria;p__Firmicutes;c__Clostridia;o__Lachnospirales;f__Lachnospiraceae;g__Ruminococcus_gnavus_group	0	0	2.72035e-05	0	0	0	0	0	0.000771258	0	0	0	0	0	0	0	0	0	6.87262e-05	0	0	0	0	0	0	0	0	2.92193e-05	0	0	0	0
d__Bacteria;k__norank_d__Bacteria;p__Firmicutes;c__Clostridia;o__Lachnospirales;f__Lachnospiraceae;g__Ruminococcus_torques_group	0.000966055	0.00568711	0.000816104	0.00319499	0.00375102	0.000596608	0.00129096	0.00133901	0.0171284	0.00756654	0.00472072	0.00873943	0.00556671	0.000262889	0.000375538	0.000685488	0.0021397	0.000622779	0	0.00106681	0.0003058	7.32091e-05	0.00342282	0.000216738	0.000331335	0.00657083	0	0.00222066	0.000556467	0	0.00258968	0.000126235
d__Bacteria;k__norank_d__Bacteria;p__Firmicutes;c__Clostridia;o__Lachnospirales;f__Lachnospiraceae;g__Sellimonas	0	0.0240015	0.0288357	0	0	0	0	0	0	0.00154298	0.00200159	0	2.86944e-05	0	0	0	0.00158752	0.000366341	0	0.0047673	0	3.66046e-05	0.0261745	0	0	0.000431885	0	0.000146096	0	0	0.000490677	0
d__Bacteria;k__norank_d__Bacteria;p__Firmicutes;c__Clostridia;o__Lachnospirales;f__Lachnospiraceae;g__Tyzzerella	9.99367e-05	0.0018957	0.00201306	0.0045928	0	0	0	0	9.64072e-05	0	0.00105744	0.000424244	0	0	0	0.000253884	0	0	0	0.000200027	0	0	0	0	0	0	3.04164e-05	0.000175316	0	0	0.000272598	0
d__Bacteria;k__norank_d__Bacteria;p__Firmicutes;c__Clostridia;o__Lachnospirales;f__Lachnospiraceae;g__norank_f__Lachnospiraceae	0.00059962	0	0	0	0	0	0	0	0.000192814	0	0.000339892	0.000311112	2.86944e-05	8.76296e-05	5.77751e-05	0	0	0	0	0	0	0	0	0	0	0	0	0	0	0	5.45197e-05	6.31174e-05
d__Bacteria;k__norank_d__Bacteria;p__Firmicutes;c__Clostridia;o__Lachnospirales;f__Lachnospiraceae;g__unclassified_f__Lachnospiraceae	0.0118258	0.0426051	0.0278292	0.0862981	0.0065112	0.000852297	0.000628931	0.000386824	0.00330998	0.00854574	0.00203935	0.010295	0.00235294	0.000408938	0.0011555	0.00167564	0.000103534	0.000329707	0.0127143	0.00110015	0.000849444	0.000219627	0.00174497	9.28879e-05	0	0.00462734	6.08328e-05	0.000350631	0.000234302	0	0.000517937	0.000189352
d__Bacteria;k__norank_d__Bacteria;p__Firmicutes;c__Clostridia;o__Monoglobales;f__Monoglobaceae;g__Monoglobus	3.33122e-05	0.000674742	0.000136017	0.00143109	3.5387e-05	0	0	0	9.64072e-05	0.00121658	0.000906379	0.000876771	0	0.000146049	0	2.53884e-05	0	0.000439609	0	0.00240032	0	0	0.000134228	0	0	0.000524432	0	0.000555166	0	0	0.000299858	0
d__Bacteria;k__norank_d__Bacteria;p__Firmicutes;c__Clostridia;o__Oscillospirales;f__Butyricicoccaceae;g__Butyricicoccus	0.00029981	0.00395206	2.72035e-05	0.00153093	0.000424643	4.26148e-05	0.00019861	0.00202339	0.00167106	0.00189905	3.77658e-05	0.00172526	0.001033	5.84197e-05	0.000144438	0.000355438	0	3.66341e-05	0	0.00170023	3.39778e-05	0	0.000134228	0	0	0.000401037	0	0.000525947	2.92877e-05	0	0.000190819	3.15587e-05
d__Bacteria;k__norank_d__Bacteria;p__Firmicutes;c__Clostridia;o__Oscillospirales;f__Butyricicoccaceae;g__UCG-009	0	0	0	0.00242953	3.5387e-05	0	0	0	0	8.90181e-05	0	0.000113132	0	0	0	0	0	0	0	0	0	0	0	0	0	0	0	0	0	0	0	0
d__Bacteria;k__norank_d__Bacteria;p__Firmicutes;c__Clostridia;o__Oscillospirales;f__Butyricicoccaceae;g__norank_f__Butyricicoccaceae	0	0	0	0	0	0.00187505	0	0	0	0	0	0	0	0.000116839	0	0	0	0	0	0	0	0	0	0	0	0	0	0	0	0	0	0
d__Bacteria;k__norank_d__Bacteria;p__Firmicutes;c__Clostridia;o__Oscillospirales;f__Ethanoligenenaceae;g__Acetanaerobacterium	0	0	8.16104e-05	0	0.000106161	0	0	0	0	0	0	0	0	0	0	0	0	0	0	0	0	0	0	0	0	0	0	0	2.92877e-05	0	0	0
d__Bacteria;k__norank_d__Bacteria;p__Firmicutes;c__Clostridia;o__Oscillospirales;f__Eubacterium_coprostanoligenes_group;g__norank_f__Eubacterium_coprostanoligenes_group	0	0.00170292	0	0.0015975	0.00106161	8.52297e-05	0.00248262	0	0	0.000919854	0.000113297	0.000820205	0.000143472	0.000379728	0.000202213	0	3.45113e-05	0	0	0.000266702	0.0009174	0	0.000402685	0.00105273	0	0	0	2.92193e-05	0.000117151	0	2.72598e-05	0.000252469
d__Bacteria;k__norank_d__Bacteria;p__Firmicutes;c__Clostridia;o__Oscillospirales;f__Oscillospiraceae;g__Colidextribacter	0	0.000160653	0	9.98436e-05	0.000389257	0	0	0	0	0.000415418	3.77658e-05	0.001499	0.000114778	0.000146049	0	0	0	0	0	3.33378e-05	3.39778e-05	0	0	0	0	0	0	5.84385e-05	0	0	0.000245339	0.000126235
d__Bacteria;k__norank_d__Bacteria;p__Firmicutes;c__Clostridia;o__Oscillospirales;f__Oscillospiraceae;g__Flavonifractor	0.00196542	3.21306e-05	5.4407e-05	0.000133125	0.000495417	4.26148e-05	0.000231711	0	0.000385629	0.000682472	0.000302126	0.000452527	0	5.84197e-05	0	5.07769e-05	0	0.000402975	0	0	0.000169889	0	3.3557e-05	0	0	0.00101802	0	2.92193e-05	0	0	0	0
d__Bacteria;k__norank_d__Bacteria;p__Firmicutes;c__Clostridia;o__Oscillospirales;f__Oscillospiraceae;g__NK4A214_group	0	0	0	0.000599061	0.000495417	0.000170459	0.000231711	2.97557e-05	0	0	0	0.00096162	2.86944e-05	8.76296e-05	0.000144438	2.53884e-05	0	0	0	0	0.00197071	0	0.000704698	3.09626e-05	0	0	0	0	2.92877e-05	0	0.00242613	0
d__Bacteria;k__norank_d__Bacteria;p__Firmicutes;c__Clostridia;o__Oscillospirales;f__Oscillospiraceae;g__Oscillibacter	0	0.00147801	2.72035e-05	0.00146437	0.0008139	0	0.000695134	0	0	0.00145396	0.000151063	0.00178183	0.000114778	8.76296e-05	0.000173325	0	0	0	0	3.33378e-05	0.00377153	0	3.3557e-05	0	0	0	0	2.92193e-05	0	0	5.45197e-05	0
d__Bacteria;k__norank_d__Bacteria;p__Firmicutes;c__Clostridia;o__Oscillospirales;f__Oscillospiraceae;g__Oscillospira	0	0	0	0.000366093	0.000106161	0	0	0	0	0	0	0.000141415	2.86944e-05	0	0	0	0	0	0	0	0	0	0	0	0	0	0	0	0	0	2.72598e-05	0
d__Bacteria;k__norank_d__Bacteria;p__Firmicutes;c__Clostridia;o__Oscillospirales;f__Oscillospiraceae;g__UCG-002	0	0	0.000217628	0.00119812	0.0379702	0.000383534	0.00506455	0.000119023	0	0	0	0.000113132	0.00384505	0.000350518	0.000953289	2.53884e-05	0	0	0	0.00200027	0.0036696	0	0.000671141	0.000247701	0	0	0	0.000642824	0.000849344	0	0.00596991	0.000189352
d__Bacteria;k__norank_d__Bacteria;p__Firmicutes;c__Clostridia;o__Oscillospirales;f__Oscillospiraceae;g__UCG-003	3.33122e-05	0.000224914	0	0.00183047	0.00205244	0	9.93049e-05	0	0	0.000504436	0	0.000763639	8.60832e-05	2.92099e-05	5.77751e-05	0	0	0	0	0	0.000475689	7.32091e-05	6.71141e-05	0	0	9.25469e-05	0	0	0	0	5.45197e-05	6.31174e-05
d__Bacteria;k__norank_d__Bacteria;p__Firmicutes;c__Clostridia;o__Oscillospirales;f__Oscillospiraceae;g__UCG-005	0	0	0	0.000732186	0.00467108	4.26148e-05	3.31016e-05	0	0	0	0	0.000254546	0.000344333	0	2.88875e-05	0	0	0	0	0	0.000713533	0	0.000436242	3.09626e-05	0	0	0	0	2.92877e-05	0	0.000708756	3.15587e-05
d__Bacteria;k__norank_d__Bacteria;p__Firmicutes;c__Clostridia;o__Oscillospirales;f__Oscillospiraceae;g__UCG-007	0	0	0	3.32812e-05	0	0	0	0	0	0	0	8.48488e-05	0	0	0	0	0	0	0	0	0	0	0	0	0	0	0	0	0	0	0	0
d__Bacteria;k__norank_d__Bacteria;p__Firmicutes;c__Clostridia;o__Oscillospirales;f__Oscillospiraceae;g__norank_f__Oscillospiraceae	0	0.00906082	0	0.00109828	0.00276018	0	6.62032e-05	0	0	0.000623127	0	0.00141415	0.000918221	0	0	0	0	0	0	0.000133351	0	0	3.3557e-05	0	0	0	0	5.84385e-05	0	0	0.0026442	3.15587e-05
d__Bacteria;k__norank_d__Bacteria;p__Firmicutes;c__Clostridia;o__Oscillospirales;f__Oscillospiraceae;g__unclassified_f__Oscillospiraceae	0	0.00054622	5.4407e-05	0.00402702	0.00102622	0.000127845	0	0	0	0.000474763	0	0.00144243	5.73888e-05	0	0	0	0	0	0	0	0.000679556	0	3.3557e-05	0	0	0	0	0	0.00026359	0	2.72598e-05	0
d__Bacteria;k__norank_d__Bacteria;p__Firmicutes;c__Clostridia;o__Oscillospirales;f__Ruminococcaceae;g__Anaerofilum	0	0	0	6.65624e-05	0	4.26148e-05	0	0	0	0	0	5.65659e-05	0	0	0	0	0	0	0	0	0	0	3.3557e-05	0	0	0	0	0	0	0	0	0
d__Bacteria;k__norank_d__Bacteria;p__Firmicutes;c__Clostridia;o__Oscillospirales;f__Ruminococcaceae;g__Anaerotruncus	0	0	0	0	0.000176935	0	0	0	0	8.90181e-05	0	8.48488e-05	5.73888e-05	0	0	0	0	0	0	0	0	0	0	0	0	0	0	0	0	0	8.17795e-05	0
d__Bacteria;k__norank_d__Bacteria;p__Firmicutes;c__Clostridia;o__Oscillospirales;f__Ruminococcaceae;g__CAG-352	0	0	0	0	0.000176935	0	0	0	0	0	0	0	0.000200861	0	0	0	0	0	0	0	0	0	0	0	0	0	0	0	0	0	0	0
d__Bacteria;k__norank_d__Bacteria;p__Firmicutes;c__Clostridia;o__Oscillospirales;f__Ruminococcaceae;g__Candidatus_Soleaferrea	0.00029981	0.000385567	0.000272035	0.000366093	0.000176935	0.000383534	6.62032e-05	2.97557e-05	0	2.96727e-05	0	0	0	0	0	0	0	0	0	0	0	0	6.71141e-05	0	0	0	0	0	0	0	2.72598e-05	0
d__Bacteria;k__norank_d__Bacteria;p__Firmicutes;c__Clostridia;o__Oscillospirales;f__Ruminococcaceae;g__DTU089	0	6.42612e-05	0	0	0	0	0	0	0	2.96727e-05	0	5.65659e-05	0	0	0	0	0	0	0	0	0	0	0	0	0	0	0	0	0	0	0	0
d__Bacteria;k__norank_d__Bacteria;p__Firmicutes;c__Clostridia;o__Oscillospirales;f__Ruminococcaceae;g__Eubacterium_siraeum_group	0	0	0	0	0	0	0	0	0	0	0	5.65659e-05	0	0	0	0	0	0	0	0	0.000441711	0	0	0	0	9.25469e-05	0	0	2.92877e-05	0	0	0
d__Bacteria;k__norank_d__Bacteria;p__Firmicutes;c__Clostridia;o__Oscillospirales;f__Ruminococcaceae;g__Faecalibacterium	0	0.0100247	0.000353645	0.00232968	0.00392795	0.00153413	0.00142337	0.000327313	0	0.0785437	0.0173723	0.0399355	0.00935438	0.00642617	0.00829072	0.00129481	0	0.000219804	0	0.000766769	0.00169889	0	0.000503356	9.28879e-05	0	0.0919916	0	0.00549322	0.00026359	0	0.00182641	0.00113611
d__Bacteria;k__norank_d__Bacteria;p__Firmicutes;c__Clostridia;o__Oscillospirales;f__Ruminococcaceae;g__Fournierella	0	3.21306e-05	0	9.98436e-05	0	0	0	0	0	0	0	0.000113132	0	0	0	0	0	0	0	0	0	0	0	0	0	0	0	0	0	0	0	0
d__Bacteria;k__norank_d__Bacteria;p__Firmicutes;c__Clostridia;o__Oscillospirales;f__Ruminococcaceae;g__Negativibacillus	0	0.00899656	0.000136017	0.000998436	0.0024417	0.00720191	0	0	0	0.0029376	0	0.000650508	0.000114778	0	5.77751e-05	0	0	0	0	0	0.0067276	0	0.00033557	0	0	0	0	0	0	0	2.72598e-05	6.31174e-05
d__Bacteria;k__norank_d__Bacteria;p__Firmicutes;c__Clostridia;o__Oscillospirales;f__Ruminococcaceae;g__Paludicola	0	0	0	0.000432656	0.000176935	0	0	0	0	0	0	0.000141415	2.86944e-05	2.92099e-05	0	0	0	0	0	0	0	0	0	0	0	0	0	0	0	0	0	0
d__Bacteria;k__norank_d__Bacteria;p__Firmicutes;c__Clostridia;o__Oscillospirales;f__Ruminococcaceae;g__Phocea	0	0	0	0	7.07739e-05	0	0	0	0	0	0	8.48488e-05	0	0	0	0	0	0	0	0	0	0	0	0	0	0	0	0	0	0	0	0
d__Bacteria;k__norank_d__Bacteria;p__Firmicutes;c__Clostridia;o__Oscillospirales;f__Ruminococcaceae;g__Ruminococcus	0.000233186	0.00167079	0.000272035	0.015742	0.00247709	0.000255689	0.00158888	0.000238046	9.64072e-05	0.00581585	0.000566487	0.0248607	0.00232425	0.000262889	0.00268654	5.07769e-05	0	0.00142873	0	0.0120349	0.000271822	3.66046e-05	0.0195638	9.28879e-05	0	0.0135427	0	0.00753857	0.000117151	0	0.0106859	0
d__Bacteria;k__norank_d__Bacteria;p__Firmicutes;c__Clostridia;o__Oscillospirales;f__Ruminococcaceae;g__Subdoligranulum	0	0.0490313	0	0.0452624	0.0179766	0.00366488	0.00175439	0.074181	0	0.00925789	0	0.0277456	0.026198	0.000262889	0.00106884	0.000304661	0.00051767	0.000622779	0	0	0.00105331	0.00106153	0	0.00346781	3.01214e-05	0.00339339	0	0	0.00278233	0.000299338	0	0.000284028
d__Bacteria;k__norank_d__Bacteria;p__Firmicutes;c__Clostridia;o__Oscillospirales;f__Ruminococcaceae;g__UBA1819	0	0.000417698	0.000244831	0.000765467	0.000141548	0.000383534	0	5.95114e-05	0	5.93454e-05	0.000113297	0.000311112	0.00025825	2.92099e-05	0	0	6.90226e-05	0	0	6.66756e-05	6.79556e-05	0	0.000637584	0	0	3.0849e-05	0	0	0	0	0.000136299	0
d__Bacteria;k__norank_d__Bacteria;p__Firmicutes;c__Clostridia;o__Oscillospirales;f__Ruminococcaceae;g__norank_f__Ruminococcaceae	0	0.000610481	5.4407e-05	0.00622358	0.00421105	0.0278275	3.31016e-05	0.000148779	0	0.000504436	3.77658e-05	0.00407274	0.00332855	0.000116839	0	2.53884e-05	3.45113e-05	0	0	6.66756e-05	0.000679556	0	0.000134228	0.00130043	0	0.000123396	0	5.84385e-05	0.000439316	0	0.000245339	0.000757408
d__Bacteria;k__norank_d__Bacteria;p__Firmicutes;c__Clostridia;o__Oscillospirales;f__Ruminococcaceae;g__unclassified_f__Ruminococcaceae	0	0	2.72035e-05	0.00103172	0.00102622	0.000639223	3.31016e-05	0	0	2.96727e-05	0	0.000141415	0.000200861	0	0	0	0	0	0	0	0	0	3.3557e-05	0	0	0	0	0	2.92877e-05	0	0.000218079	0
d__Bacteria;k__norank_d__Bacteria;p__Firmicutes;c__Clostridia;o__Oscillospirales;f__UCG-010;g__norank_f__UCG-010	0	0	0	0	0.000389257	0	0	0	0	0	0	2.82829e-05	8.60832e-05	0	0	0	0	0	0	0	0.00411131	0	0	3.09626e-05	0	0	0	0	0.000117151	0	5.45197e-05	0
d__Bacteria;k__norank_d__Bacteria;p__Firmicutes;c__Clostridia;o__Oscillospirales;f__norank_o__Oscillospirales;g__Hydrogenoanaerobacterium	0	0	0	0	0	0	0	0	0	0	0	0	0	0	0	0	0	0	0	0	0	0	0	0	0	0	0	0	0	0	0	0
d__Bacteria;k__norank_d__Bacteria;p__Firmicutes;c__Clostridia;o__Oscillospirales;f__norank_o__Oscillospirales;g__norank_f__norank_o__Oscillospirales	0	0	0	0	0	0	0	0	0	0	0	8.48488e-05	0	0	0	0	0	0	0	0	0	0	3.3557e-05	0	0	0	0	0	0	0	0	0
d__Bacteria;k__norank_d__Bacteria;p__Firmicutes;c__Clostridia;o__Oscillospirales;f__unclassified_o__Oscillospirales;g__unclassified_o__Oscillospirales	0	3.21306e-05	0	0.000499218	0.000106161	0	0	0	0	5.93454e-05	0	2.82829e-05	2.86944e-05	0	0	0	0	0	0	0	6.79556e-05	0	0	0	0	0	0	0	2.92877e-05	0	0	0
d__Bacteria;k__norank_d__Bacteria;p__Firmicutes;c__Clostridia;o__Peptococcales;f__Peptococcaceae;g__Peptococcus	0	0	0	0	0	0	0	0	0	0	0	0	0	0	0	0	0	0	0	0	0	0	0	3.09626e-05	0	0	0	0	0	0	0	0
d__Bacteria;k__norank_d__Bacteria;p__Firmicutes;c__Clostridia;o__Peptococcales;f__Peptococcaceae;g__norank_f__Peptococcaceae	0	0	0	3.32812e-05	0	0	0	0	0	0	0	2.82829e-05	0	0	0	0	0	0	0	0	0	0	0	0	0	0	0	0	5.85754e-05	0	0	0
d__Bacteria;k__norank_d__Bacteria;p__Firmicutes;c__Clostridia;o__Peptostreptococcales-Tissierellales;f__Anaerovoracaceae;g__Eubacterium_brachy_group	0	0	0	3.32812e-05	0	0	0	0	0	0	0	2.82829e-05	0	0	0	0	0	0	0	0	0	0	0.000302013	0	0	0	0	0	2.92877e-05	0	8.17795e-05	0
d__Bacteria;k__norank_d__Bacteria;p__Firmicutes;c__Clostridia;o__Peptostreptococcales-Tissierellales;f__Anaerovoracaceae;g__Eubacterium_nodatum_group	0	0	0	0	0	0	0	0	0	0	0	0	0	0	0	0	0	0	0	0	0	0	0	0	0	0	0	0	0	0	0	0
d__Bacteria;k__norank_d__Bacteria;p__Firmicutes;c__Clostridia;o__Peptostreptococcales-Tissierellales;f__Anaerovoracaceae;g__Family_XIII_AD3011_group	0	9.63917e-05	0	0.000133125	3.5387e-05	0	0	0	0	8.90181e-05	0	8.48488e-05	5.73888e-05	0	0	0	0	0	0	0	0.000135911	0	0.000268456	0	0	0	0	0	0.000117151	0	0.000463417	3.15587e-05
d__Bacteria;k__norank_d__Bacteria;p__Firmicutes;c__Clostridia;o__Peptostreptococcales-Tissierellales;f__Anaerovoracaceae;g__Family_XIII_UCG-001	0	0	0	3.32812e-05	7.07739e-05	0	0	0	0	0	0	2.82829e-05	0	0	0	0	0	0	0	0	0	0	0	0	0	0	0	0	0	0	0	0
d__Bacteria;k__norank_d__Bacteria;p__Firmicutes;c__Clostridia;o__Peptostreptococcales-Tissierellales;f__Peptostreptococcaceae;g__Intestinibacter	0.000233186	9.63917e-05	0.000108814	0	0.00035387	0.000127845	0.000728236	0.00264826	0	0.000207709	0.00328562	0.000169698	0.000344333	0	0.000144438	0	0	0.000293072	0.000859077	0.00230031	0.0009174	0	0.00211409	0.00108369	0	0.000524432	0	0.00187003	0.000966495	0	0.00149929	0.00072585
d__Bacteria;k__norank_d__Bacteria;p__Firmicutes;c__Clostridia;o__Peptostreptococcales-Tissierellales;f__Peptostreptococcaceae;g__Peptostreptococcus	0.000366435	0	0	0	0.000106161	0	0	0	0	0	0	0	0	0	0	0	0	0.000402975	0	0.000133351	0.000271822	0	0	0	0	0	0	0	2.92877e-05	0	0	0
d__Bacteria;k__norank_d__Bacteria;p__Firmicutes;c__Clostridia;o__Peptostreptococcales-Tissierellales;f__Peptostreptococcaceae;g__Romboutsia	0.0226856	0.0119204	0.000244831	0.000898592	0.00891751	0.0120174	0.00999669	0.00490969	0.00257086	0.00222545	3.77658e-05	0.000622225	0.0139455	0.00113919	0.000664413	0.000787042	0	0.00135546	0.00728497	0.0141686	0.00210662	0	0.0886577	9.28879e-05	0	0.000555281	0.00431913	0.0146681	0.0028702	0	0.0517937	3.15587e-05
d__Bacteria;k__norank_d__Bacteria;p__Firmicutes;c__Clostridia;o__Peptostreptococcales-Tissierellales;f__Peptostreptococcaceae;g__unclassified_f__Peptostreptococcaceae	0.000133249	0.000128522	0	0	0.000212322	0.000681838	0.000628931	8.92671e-05	0	2.96727e-05	0	2.82829e-05	0.000430416	2.92099e-05	0	0	0	7.32681e-05	0.000549809	0.000666756	0.000101933	0	0.00187919	0	0	3.0849e-05	6.08328e-05	0.000730482	0.000322165	0	0.000790535	0
d__Bacteria;k__norank_d__Bacteria;p__Firmicutes;c__Clostridia;o__Peptostreptococcales-Tissierellales;f__norank_o__Peptostreptococcales-Tissierellales;g__Anaerococcus	0	3.21306e-05	2.72035e-05	0	0	0	0	0	0	0	0	0	0	0	0	0	0	0	0	3.33378e-05	0	0	0.000268456	0	0	0	0	2.92193e-05	0	0	2.72598e-05	0
d__Bacteria;k__norank_d__Bacteria;p__Firmicutes;c__Clostridia;o__Peptostreptococcales-Tissierellales;f__norank_o__Peptostreptococcales-Tissierellales;g__Ezakiella	0	0	0	0	0	0	0	0	0	0	0	0	0	0	0	0	0	0	0	3.33378e-05	0	0	6.71141e-05	0	0	0	0	0	0	0	0	0
d__Bacteria;k__norank_d__Bacteria;p__Firmicutes;c__Clostridia;o__Peptostreptococcales-Tissierellales;f__norank_o__Peptostreptococcales-Tissierellales;g__Finegoldia	3.33122e-05	3.21306e-05	0.000163221	0	0	0	0	2.97557e-05	0	0	0	0	0	0	0	0	0	0	0	3.33378e-05	0	0	0.000234899	0	0	3.0849e-05	0	0	0	0	0	0
d__Bacteria;k__norank_d__Bacteria;p__Firmicutes;c__Clostridia;o__Peptostreptococcales-Tissierellales;f__norank_o__Peptostreptococcales-Tissierellales;g__Parvimonas	0	0	0	0	0	0	0	0	0	0	0	0	0	0	0	0	0	0	0	3.33378e-05	0	0	0	3.09626e-05	0	0	0	0	0	0	0	0
d__Bacteria;k__norank_d__Bacteria;p__Firmicutes;c__Clostridia;o__Peptostreptococcales-Tissierellales;f__norank_o__Peptostreptococcales-Tissierellales;g__Peptoniphilus	9.99367e-05	6.42612e-05	0.000435256	0	0	4.26148e-05	0	0	0	0	0	0	0	0	0	0	3.45113e-05	3.66341e-05	0	0.000133351	0.00234447	0	0.00218121	0	0	0	0	0	0	0	0	0
d__Bacteria;k__norank_d__Bacteria;p__Firmicutes;c__Clostridia;o__norank_c__Clostridia;f__Hungateiclostridiaceae;g__Ruminiclostridium	0	0	0	0	3.5387e-05	0	0	0	0	0	0	0	2.86944e-05	0	0	0	0	0	0	0	0	0	0	0	0	0	0	0	0	0	0	0
d__Bacteria;k__norank_d__Bacteria;p__Firmicutes;c__Clostridia;o__norank_c__Clostridia;f__norank_o__norank_c__Clostridia;g__norank_f__norank_o__norank_c__Clostridia	0	0	0	3.32812e-05	0	0	0	0	0	0	0	0	0	0	0	0	0	0	0	0	0	0	0	0	0	0	0	0	0	0	0	0
d__Bacteria;k__norank_d__Bacteria;p__Firmicutes;c__Clostridia;o__unclassified_c__Clostridia;f__unclassified_c__Clostridia;g__unclassified_c__Clostridia	0	0	0	3.32812e-05	3.5387e-05	0	0	0	0	0	0	5.65659e-05	0	0	0	0	0	0	0	6.66756e-05	0	0	0	0	0	0	0	0	0	0	0	0
d__Bacteria;k__norank_d__Bacteria;p__Firmicutes;c__Negativicutes;o__Acidaminococcales;f__Acidaminococcaceae;g__Acidaminococcus	0	3.21306e-05	0	0	0	0	0	0.0553159	0	0	0	0	0	0	0	0.000990149	0	0	0	0.0179357	0	0.00190344	0	0	0	0	0	0.0116877	0	0.0209537	0	0
d__Bacteria;k__norank_d__Bacteria;p__Firmicutes;c__Negativicutes;o__Acidaminococcales;f__Acidaminococcaceae;g__Phascolarctobacterium	0.0344115	0.0117277	0.117655	0.075981	0.0445168	0.000170459	0.0453161	0.264141	0.0398483	0.000682472	0.00362551	0.0528608	0.0242755	0	0.00101106	0.000787042	0.086865	0.000329707	0.137349	0.114815	0.009174	0.0392035	0.0181544	0.00161006	0.00373505	0	0.000912492	0.0159245	0.00026359	0.0020355	0.000163559	3.15587e-05
d__Bacteria;k__norank_d__Bacteria;p__Firmicutes;c__Negativicutes;o__Veillonellales-Selenomonadales;f__Selenomonadaceae;g__Megamonas	0.000433059	0	0	0	3.5387e-05	0.027103	0.00529626	0.0399917	3.21357e-05	0	0	0	0.00777618	0.627779	0.448624	0.739083	0.0361334	0	0.115769	0.181758	0	0.0135803	0.000302013	0.000805028	0.793096	0	0.871977	0.0641071	0	0.56105	0.0161923	0.848045
d__Bacteria;k__norank_d__Bacteria;p__Firmicutes;c__Negativicutes;o__Veillonellales-Selenomonadales;f__Selenomonadaceae;g__Mitsuokella	0	0	0	0	0	0	0	0	0	0	0	0	0	0	0	0	0	0	0	0	0	0	0	0	0	0	0	0	0	0	0	0
d__Bacteria;k__norank_d__Bacteria;p__Firmicutes;c__Negativicutes;o__Veillonellales-Selenomonadales;f__Selenomonadaceae;g__norank_f__Selenomonadaceae	0	0	0	0	0	0	0	0	3.21357e-05	0	0	0	0	0	0	0	0	0	0	0	0	0	0	0	0	0	0	0	0	0	0	0
d__Bacteria;k__norank_d__Bacteria;p__Firmicutes;c__Negativicutes;o__Veillonellales-Selenomonadales;f__Selenomonadaceae;g__unclassified_f__Selenomonadaceae	0	0	0	0	0	0	0	0	0	0	0	0	0	0	0	0	0	0	0	0	0	0	0	0	0	0	0	0	0	0.000119735	0	0
d__Bacteria;k__norank_d__Bacteria;p__Firmicutes;c__Negativicutes;o__Veillonellales-Selenomonadales;f__Veillonellaceae;g__Allisonella	0	0	0	0	0	0.000937527	0	0	0	0	0	0	0	0.00484884	0	0	0	0	0	3.33378e-05	0	0	0	6.19253e-05	0	0	0	5.84385e-05	0	0	0	0
d__Bacteria;k__norank_d__Bacteria;p__Firmicutes;c__Negativicutes;o__Veillonellales-Selenomonadales;f__Veillonellaceae;g__Anaeroglobus	0	0	0	0	0	0	0	2.97557e-05	0	0	0	0	0	0	0	0	0	0	0	0.000133351	0	0	0	0	0	0	0	8.76578e-05	0	0	0	0
d__Bacteria;k__norank_d__Bacteria;p__Firmicutes;c__Negativicutes;o__Veillonellales-Selenomonadales;f__Veillonellaceae;g__Dialister	0.000866118	0.149311	0.0186344	0	0.0027248	0.0726157	3.31016e-05	0	6.42715e-05	0.0533515	0.00472072	0	0.000315638	0.00814955	0	0	0	0.000109902	0	0.000100013	0.00326187	7.32091e-05	0	0.00325108	0	0	0	0.000116877	8.78632e-05	0	0	0.00501783
d__Bacteria;k__norank_d__Bacteria;p__Firmicutes;c__Negativicutes;o__Veillonellales-Selenomonadales;f__Veillonellaceae;g__Megasphaera	0	0	0	0	7.07739e-05	0	0	0	0	0	0	0	0.0110473	0	0	0	0	0	0	0.00313375	0	0	0.000436242	0	0	0	0	0.19051	0	0	0.000517937	0
d__Bacteria;k__norank_d__Bacteria;p__Firmicutes;c__Negativicutes;o__Veillonellales-Selenomonadales;f__Veillonellaceae;g__Veillonella	0.0429395	3.21306e-05	0.000163221	3.32812e-05	3.5387e-05	0	0.000397219	0.000743893	0.00944791	0	0	0	0	0	0	0	0	0.0846613	0.000103089	0.0180357	0.000713533	0	0	9.28879e-05	0	0.00357848	0	0.005464	0.000117151	0	0	0
d__Bacteria;k__norank_d__Bacteria;p__Firmicutes;c__Negativicutes;o__Veillonellales-Selenomonadales;f__unclassified_o__Veillonellales-Selenomonadales;g__unclassified_o__Veillonellales-Selenomonadales	0	0	0	0	0	0.000213074	0	0	0	0	0	0	0.000114778	0.000116839	0	0	0	0	0	0.000400053	0	0	0	0	0	0	0	0.0146973	0	0	0	3.15587e-05
d__Bacteria;k__norank_d__Bacteria;p__Firmicutes;c__Negativicutes;o__unclassified_c__Negativicutes;f__unclassified_c__Negativicutes;g__unclassified_c__Negativicutes	0	0	0	0	0	4.26148e-05	0.000430321	0.00401702	3.21357e-05	0	0	0	0.000229555	0	0.000404426	0.000837819	0.00217421	0	0.00584172	0.0154354	0	0.000988323	0	0	0.00204825	0	0.000182498	0.0016655	0	0.000598677	0	3.15587e-05
d__Bacteria;k__norank_d__Bacteria;p__Firmicutes;c__norank_p__Firmicutes;o__norank_c__norank_p__Firmicutes;f__norank_o__norank_c__norank_p__Firmicutes;g__norank_f__norank_o__norank_c__norank_p__Firmicutes	0	0	0	0	0	0	0	0	0	0	0	0.000113132	0	0	0	0	0	0	0	0	0	0	0	0	0	0	0	0	0	0	0	0
d__Bacteria;k__norank_d__Bacteria;p__Firmicutes;c__unclassified_p__Firmicutes;o__unclassified_p__Firmicutes;f__unclassified_p__Firmicutes;g__unclassified_p__Firmicutes	0.000699557	0	0	0	0.000176935	0.000298304	6.62032e-05	0	0.00475609	2.96727e-05	0	0	0.000918221	0.00192785	0.00173325	0.000863207	6.90226e-05	0	0.000103089	0.00163355	6.79556e-05	0	0.000134228	0	0.000753035	0	0.00179457	0.00493806	2.92877e-05	0	0.000790535	0.000820526
d__Bacteria;k__norank_d__Bacteria;p__Fusobacteriota;c__Fusobacteriia;o__Fusobacteriales;f__Fusobacteriaceae;g__Fusobacterium	0.000333122	0	8.16104e-05	0	0	0	0	2.97557e-05	0.000931936	0	0	0	0	0	0	2.53884e-05	0	3.66341e-05	0	0.000666756	0	0	0	0	0	0.000277641	0	2.92193e-05	0	2.99338e-05	0	0
d__Bacteria;k__norank_d__Bacteria;p__Patescibacteria;c__Saccharimonadia;o__Saccharimonadales;f__Saccharimonadaceae;g__TM7x	0	0	0	0	0	0	3.31016e-05	0	0	0	0	0	0	0	0	0	0	0	3.43631e-05	0.000133351	0	0	0	0	0	0	0	2.92193e-05	0	0	2.72598e-05	0
d__Bacteria;k__norank_d__Bacteria;p__Patescibacteria;c__Saccharimonadia;o__Saccharimonadales;f__Saccharimonadaceae;g__norank_f__Saccharimonadaceae	0	0	0	0	0	0	0	0	0	0	0	0	0	0	0	0	0	0	0	0	0	0	3.3557e-05	0	0	0	0	2.92193e-05	0	0	2.72598e-05	0
d__Bacteria;k__norank_d__Bacteria;p__Patescibacteria;c__Saccharimonadia;o__Saccharimonadales;f__norank_o__Saccharimonadales;g__norank_f__norank_o__Saccharimonadales	0	0	0	0	0	0	3.31016e-05	0	0	0	0	0	0	0	0	0	0	0	0	3.33378e-05	0	0	0	0	0	0	0	0	0	0	0	0
d__Bacteria;k__norank_d__Bacteria;p__Proteobacteria;c__Alphaproteobacteria;o__Caulobacterales;f__Caulobacteraceae;g__Brevundimonas	0	0	0	0	0	0	3.31016e-05	2.97557e-05	0	0	0	0	0	0	0	0	0	0	3.43631e-05	0	0	0.000183023	0.000100671	0	0	0	0	0	5.85754e-05	0	0	0
d__Bacteria;k__norank_d__Bacteria;p__Proteobacteria;c__Alphaproteobacteria;o__Caulobacterales;f__Caulobacteraceae;g__norank_f__Caulobacteraceae	0	0	0	0	0	0	0	2.97557e-05	0	0	0	0	0	0	0	0	0	0	6.87262e-05	0	0	0	0.000100671	0	0	0	0	0	0	0	0	0
d__Bacteria;k__norank_d__Bacteria;p__Proteobacteria;c__Alphaproteobacteria;o__Micavibrionales;f__norank_o__Micavibrionales;g__norank_f__norank_o__Micavibrionales	0	0	0	0	0	0	0	0	0	0	0	0	0	0	0	0	0	0	0	0	0	0	0	0	0	0	0	0	0	0	0	0
d__Bacteria;k__norank_d__Bacteria;p__Proteobacteria;c__Alphaproteobacteria;o__Rhizobiales;f__Beijerinckiaceae;g__Bosea	0	0	0	0	0	4.26148e-05	0	2.97557e-05	0	0	0	0	0	0	0	0	0	0	6.87262e-05	0	0	0	3.3557e-05	0	0	0	0	2.92193e-05	0	0	0	0
d__Bacteria;k__norank_d__Bacteria;p__Proteobacteria;c__Alphaproteobacteria;o__Rhizobiales;f__Beijerinckiaceae;g__unclassified_f__Beijerinckiaceae	0	0	0	0	0	0	0	0	0	0	0	0	0	0	0	0	0	0	0	0	0	0	0	0	0	0	0	0	0	0	0	0
d__Bacteria;k__norank_d__Bacteria;p__Proteobacteria;c__Alphaproteobacteria;o__Rhizobiales;f__Devosiaceae;g__Devosia	0	0	0	0	0	0	0	0	0	0	0	0	0	0	0	0	0	0	0	0	0	0	0	0	0	0	0	0	0	0	0	0
d__Bacteria;k__norank_d__Bacteria;p__Proteobacteria;c__Alphaproteobacteria;o__Rhizobiales;f__Rhizobiaceae;g__Allorhizobium-Neorhizobium-Pararhizobium-Rhizobium	0	0	0	3.32812e-05	0	0	6.62032e-05	0	0	0	0	0	0	0	0	0	0	0	0.000103089	0	0	0	0	0	0	0	0	0	0	0	0	0
d__Bacteria;k__norank_d__Bacteria;p__Proteobacteria;c__Alphaproteobacteria;o__Rhizobiales;f__Rhizobiaceae;g__Brucella	0	0	0	0	0	0	0	0	0	0	0	2.82829e-05	0	0	0	0	0	0	0	0	0	0	3.3557e-05	0	3.01214e-05	0	0	2.92193e-05	0	0	0	0
d__Bacteria;k__norank_d__Bacteria;p__Proteobacteria;c__Alphaproteobacteria;o__Rhizobiales;f__Rhizobiaceae;g__Mesorhizobium	0	0	0	0	0	4.26148e-05	6.62032e-05	0	0	0	0	0	0	0	0	2.53884e-05	0	7.32681e-05	3.43631e-05	0	0	7.32091e-05	0	0	0	3.0849e-05	0	0	0	0	0	0
d__Bacteria;k__norank_d__Bacteria;p__Proteobacteria;c__Alphaproteobacteria;o__Rhizobiales;f__Rhizobiales_Incertae_Sedis;g__Nordella	0	0	0	0	0	0	0	0	0	0	0	0	0	0	0	0	0	0	0	0	0	0	0	0	0	0	0	0	0	0	0	0
d__Bacteria;k__norank_d__Bacteria;p__Proteobacteria;c__Alphaproteobacteria;o__Rhizobiales;f__Xanthobacteraceae;g__Bradyrhizobium	0	0	0	0	0	0	0	0	0	0	0	0	0	0	0	0	0	0	0	0	0	0	0	0	0	0	0	0	0	0	0	0
d__Bacteria;k__norank_d__Bacteria;p__Proteobacteria;c__Alphaproteobacteria;o__Rhodobacterales;f__Rhodobacteraceae;g__Paracoccus	0	0	0	0	0	0	0	0	0	0	0	0	0	0	0	0	0	0	0	0	0	0	0	0	0	0	0	0	0	0	0	0
d__Bacteria;k__norank_d__Bacteria;p__Proteobacteria;c__Alphaproteobacteria;o__Rhodobacterales;f__Rhodobacteraceae;g__unclassified_f__Rhodobacteraceae	0	0	0	0	0	0	0	2.97557e-05	0	0	0	0	0	0	0	0	0	0	0	0	0	0	0	0	0	0	0	0	0	0	2.72598e-05	0
d__Bacteria;k__norank_d__Bacteria;p__Proteobacteria;c__Alphaproteobacteria;o__Rhodospirillales;f__norank_o__Rhodospirillales;g__norank_f__norank_o__Rhodospirillales	0	0	0	0	0	0	0	0	0	0	0	2.82829e-05	0	0	0	0	0	0	0	0	0	0	0	0	0	0	0	0	0	0	0	0
d__Bacteria;k__norank_d__Bacteria;p__Proteobacteria;c__Alphaproteobacteria;o__Sphingomonadales;f__Sphingomonadaceae;g__Sphingomonas	0	3.21306e-05	0	0	0	0	0	0	0	0	0	0	0	0	0	0	0	0	0	0	0	0	0	3.09626e-05	0	0	0	2.92193e-05	0	0	0	0
d__Bacteria;k__norank_d__Bacteria;p__Proteobacteria;c__Alphaproteobacteria;o__Sphingomonadales;f__Sphingomonadaceae;g__Sphingopyxis	0	0	0	0	0	0	0	0	0	0	0	0	0	0	0	0	0	0	0	0	0	0	0	0	0	0	0	0	0	0	0	0
d__Bacteria;k__norank_d__Bacteria;p__Proteobacteria;c__Gammaproteobacteria;o__Aeromonadales;f__Aeromonadaceae;g__Aeromonas	0	0	0	0	0	0	0	0	0	0	0	0	0	0	0	0	0	0	0	0	0	0	0	0	0	0	0	0	0	0	0	0
d__Bacteria;k__norank_d__Bacteria;p__Proteobacteria;c__Gammaproteobacteria;o__Aeromonadales;f__Succinivibrionaceae;g__Succinivibrio	0	0	0	0	0	0	0	0	0	0	0	0	0	0	0	0	0	0	0	0	0	0	0	0	0	0	0	0	0	0	0	0.00047338
d__Bacteria;k__norank_d__Bacteria;p__Proteobacteria;c__Gammaproteobacteria;o__Alteromonadales;f__Alteromonadaceae;g__Rheinheimera	0	0	0	0	0	0	0	0	0	0	0	0	0	0	0	0	0	0	0	0	0	0	0	0	0	0	0	0	0	0	0	0
d__Bacteria;k__norank_d__Bacteria;p__Proteobacteria;c__Gammaproteobacteria;o__Burkholderiales;f__Alcaligenaceae;g__Achromobacter	0	3.21306e-05	0	0	0	0	0	0	3.21357e-05	0	0	0	0	0	0	0	0	0	0	0	0	3.66046e-05	0	0	0	0	0	0	0	0	2.72598e-05	0
d__Bacteria;k__norank_d__Bacteria;p__Proteobacteria;c__Gammaproteobacteria;o__Burkholderiales;f__Alcaligenaceae;g__Alcaligenes	0	3.21306e-05	0	0	0	0	0	0	0	0	0	0	0	0	0	0	0	0	0	0	0	0	0	0	0	0	0	0	0	0	0	0
d__Bacteria;k__norank_d__Bacteria;p__Proteobacteria;c__Gammaproteobacteria;o__Burkholderiales;f__Burkholderiaceae;g__Burkholderia-Caballeronia-Paraburkholderia	0	0	0	0	0	0	0	0	0	0	0	0	0	0	0	0	0	0	0	0	0	0	3.3557e-05	0	0	3.0849e-05	0	0	0	2.99338e-05	2.72598e-05	0
d__Bacteria;k__norank_d__Bacteria;p__Proteobacteria;c__Gammaproteobacteria;o__Burkholderiales;f__Burkholderiaceae;g__Cupriavidus	0	0	0	0	0	4.26148e-05	0	2.97557e-05	0	0	0	0	0	0	0	0	0	0	3.43631e-05	0	0	7.32091e-05	0	0	0	0	0	0	0	0	0	0
d__Bacteria;k__norank_d__Bacteria;p__Proteobacteria;c__Gammaproteobacteria;o__Burkholderiales;f__Burkholderiaceae;g__Ralstonia	0	0	0	0	0	0	0	0	0	0	0	0	0	0	0	0	3.45113e-05	0	0	3.33378e-05	0	3.66046e-05	0	0	0	0	0	0	0	0	2.72598e-05	0
d__Bacteria;k__norank_d__Bacteria;p__Proteobacteria;c__Gammaproteobacteria;o__Burkholderiales;f__Comamonadaceae;g__Aquabacterium	0	0	0	0	0	0	0	0	0	0	0	0	0	0	0	0	0	0	0	0	0	0	0	0	0	0	0	0	2.92877e-05	0	0	0
d__Bacteria;k__norank_d__Bacteria;p__Proteobacteria;c__Gammaproteobacteria;o__Burkholderiales;f__Comamonadaceae;g__Comamonas	0	0	0	0	0	0	0	0	0	0	0	0	0	0	0	0	0	0	0	0	0	0	0	0	0	0	0	0	0	0	0	0
d__Bacteria;k__norank_d__Bacteria;p__Proteobacteria;c__Gammaproteobacteria;o__Burkholderiales;f__Comamonadaceae;g__Delftia	0	0	0	0	0	0	0	0	0	0	0	0	0	0	0	0	0	0	0	0	0	0	0	0	0	0	0	0	0	0	0	0
d__Bacteria;k__norank_d__Bacteria;p__Proteobacteria;c__Gammaproteobacteria;o__Burkholderiales;f__Comamonadaceae;g__unclassified_f__Comamonadaceae	0	0	0	0	0	0	0	0	0	0	0	0	0	0	0	0	0	0	0	0	0	0	0	0	0	0	0	0	0	0	2.72598e-05	0
d__Bacteria;k__norank_d__Bacteria;p__Proteobacteria;c__Gammaproteobacteria;o__Burkholderiales;f__Oxalobacteraceae;g__Massilia	0	0	0	0	0	0	0	0	0	0	0	0	0	0	0	0	0	0	0	0	0	0	0	0	0	0	0	0	0	0	0	0
d__Bacteria;k__norank_d__Bacteria;p__Proteobacteria;c__Gammaproteobacteria;o__Burkholderiales;f__Oxalobacteraceae;g__Oxalobacter	0	0	0	0	0.000106161	0	0	0	0	0	0	0	0	0	0	0	0	0	0	0	0.000101933	0	0	0	0	0	0	0	0	0	0	0
d__Bacteria;k__norank_d__Bacteria;p__Proteobacteria;c__Gammaproteobacteria;o__Burkholderiales;f__Sutterellaceae;g__Parasutterella	0	0.00552646	2.72035e-05	0.000332812	0	0	0	0	0	0.0019584	7.55316e-05	0.00138586	0	8.76296e-05	0	2.53884e-05	0	0.000219804	0	0	3.39778e-05	0	0	3.09626e-05	0	0.000616979	0	5.84385e-05	0	0	0	3.15587e-05
d__Bacteria;k__norank_d__Bacteria;p__Proteobacteria;c__Gammaproteobacteria;o__Burkholderiales;f__Sutterellaceae;g__Sutterella	0	0	0.00671926	0	0.00208783	0.00507117	0.000397219	5.95114e-05	0	0	0.025643	0	2.86944e-05	0.000204469	2.88875e-05	0.000406215	0	0	0	0	0.000101933	0	0	0	0	0	0	2.92193e-05	0	0	0	0.000157793
d__Bacteria;k__norank_d__Bacteria;p__Proteobacteria;c__Gammaproteobacteria;o__Cellvibrionales;f__Cellvibrionaceae;g__Cellvibrio	0	0	0	0	0	0	0	5.95114e-05	0	0	0	0	0	0	0	0	3.45113e-05	0	0	0	0	0	0	3.09626e-05	0	0	3.04164e-05	0	0	0	2.72598e-05	0
d__Bacteria;k__norank_d__Bacteria;p__Proteobacteria;c__Gammaproteobacteria;o__Enterobacterales;f__Enterobacteriaceae;g__Escherichia-Shigella	0.0875446	0.234071	0.483107	0.397244	0.445911	0.467527	0.560477	0.199244	0.0243268	0.000860509	0.131047	0.108154	0.361578	0.0217614	0.00314874	0.0013202	0.723875	0.425871	0.559465	0.319543	0.649485	0.276584	0.286174	0.670341	0.146721	0.0919608	0.0530158	0.00292193	0.682873	0.0664232	0.0194908	0.019882
d__Bacteria;k__norank_d__Bacteria;p__Proteobacteria;c__Gammaproteobacteria;o__Enterobacterales;f__Enterobacteriaceae;g__Klebsiella	0.344149	0.000385567	0.000136017	0.00173062	0.0346438	0.00967357	0.00238332	0.0164549	0.0841314	0	0	0.000509093	0.0136011	0.000496568	0.000317763	0.000177719	3.45113e-05	0.0886544	0	0.000433391	0.0112466	0.266225	0.0253691	0.260551	0	0.0101185	0	2.92193e-05	0.0085813	0.270692	0.00117217	0.0163158
d__Bacteria;k__norank_d__Bacteria;p__Proteobacteria;c__Gammaproteobacteria;o__Enterobacterales;f__Enterobacteriaceae;g__unclassified_f__Enterobacteriaceae	0	0	0	0	0	0	0	0	0	0	3.77658e-05	0	0	2.92099e-05	0	0	0	0	0	0	0	0	0	0	0	0	0	0	0	2.99338e-05	0	3.15587e-05
d__Bacteria;k__norank_d__Bacteria;p__Proteobacteria;c__Gammaproteobacteria;o__Enterobacterales;f__Hafniaceae;g__Hafnia-Obesumbacterium	0.0035311	0	0	0	0	0	0	0	0.00141397	0	0	0	0	0	0	0	0	0	0	0	0	0	0	0	0	0	0	0	0	0	0	0
d__Bacteria;k__norank_d__Bacteria;p__Proteobacteria;c__Gammaproteobacteria;o__Enterobacterales;f__Morganellaceae;g__Morganella	0	0	0	0	7.07739e-05	0	0	0	0	0	0	0	0	0	0	0	0	0	0	0	0	0	0	0.000650215	0	0	0	0	0	0	0	0
d__Bacteria;k__norank_d__Bacteria;p__Proteobacteria;c__Gammaproteobacteria;o__Enterobacterales;f__Morganellaceae;g__Proteus	0	0	0	0	0	0	0	0	0	0	0	0	0	0	0	0	0	0	0	0	0	0	0	0	0	0	0	0	0	0	0	0
d__Bacteria;k__norank_d__Bacteria;p__Proteobacteria;c__Gammaproteobacteria;o__Enterobacterales;f__Morganellaceae;g__Providencia	0	0	0	0	3.5387e-05	0	0	0	0	0	0	0	0	0	0	0	0	0	0	0	0	0	0	0	0	0	0	0	0	0	0	0
d__Bacteria;k__norank_d__Bacteria;p__Proteobacteria;c__Gammaproteobacteria;o__Oceanospirillales;f__Halomonadaceae;g__Halomonas	0	0	0	0	3.5387e-05	0	0	0	3.21357e-05	0	0	0	5.73888e-05	0	0	0	6.90226e-05	3.66341e-05	0	3.33378e-05	3.39778e-05	7.32091e-05	3.3557e-05	3.09626e-05	3.01214e-05	3.0849e-05	3.04164e-05	0	0	0	0	0
d__Bacteria;k__norank_d__Bacteria;p__Proteobacteria;c__Gammaproteobacteria;o__Pasteurellales;f__Pasteurellaceae;g__Haemophilus	6.66245e-05	0	2.72035e-05	0	0	0	0	0.000178534	6.42715e-05	0	3.77658e-05	0	0	0	0	0.000126942	0	0.000549511	0	0	0	0	0	0	0	0.000709526	0	0	0	0	0	0
d__Bacteria;k__norank_d__Bacteria;p__Proteobacteria;c__Gammaproteobacteria;o__Pseudomonadales;f__Moraxellaceae;g__Acinetobacter	0	0	0	0	0	0	0	8.92671e-05	0	0	0	0	0	0	0	0	0.000103534	3.66341e-05	0	0	0	3.66046e-05	6.71141e-05	0	6.02428e-05	0	3.04164e-05	0	2.92877e-05	0	5.45197e-05	0
d__Bacteria;k__norank_d__Bacteria;p__Proteobacteria;c__Gammaproteobacteria;o__Pseudomonadales;f__Pseudomonadaceae;g__Pseudomonas	3.33122e-05	0	0	0	0	0	3.31016e-05	5.95114e-05	6.42715e-05	0	3.77658e-05	0	0	0	0	0	0.000103534	0	6.87262e-05	0	0.000101933	3.66046e-05	0.000302013	3.09626e-05	3.01214e-05	6.16979e-05	3.04164e-05	2.92193e-05	0	0	8.17795e-05	3.15587e-05
d__Bacteria;k__norank_d__Bacteria;p__Proteobacteria;c__Gammaproteobacteria;o__Xanthomonadales;f__Xanthomonadaceae;g__Stenotrophomonas	3.33122e-05	9.63917e-05	2.72035e-05	0	0	0	9.93049e-05	0.000148779	3.21357e-05	0	0	2.82829e-05	2.86944e-05	0	0	0	3.45113e-05	3.66341e-05	6.87262e-05	3.33378e-05	3.39778e-05	3.66046e-05	6.71141e-05	3.09626e-05	0	0	9.12492e-05	0	5.85754e-05	0	0.000163559	3.15587e-05
d__Bacteria;k__norank_d__Bacteria;p__Synergistota;c__Synergistia;o__Synergistales;f__Synergistaceae;g__Cloacibacillus	0	0	0	0.00026625	0.000672352	8.52297e-05	0	0	0	0	0	0.000113132	0.000200861	0	0	0	0	0	0	0	0	0	0	0.000154813	0	0	0	0	0	0	0	0
d__Bacteria;k__norank_d__Bacteria;p__Synergistota;c__Synergistia;o__Synergistales;f__Synergistaceae;g__Pyramidobacter	0	0	2.72035e-05	0	0	0	0.000397219	0	0	0	0	0	0	0	8.66626e-05	0	0	0	0	0	0	0	0	0	0	0	0	0	0	0	0	0
d__Bacteria;k__norank_d__Bacteria;p__Verrucomicrobiota;c__Lentisphaeria;o__Victivallales;f__Victivallaceae;g__Victivallis	0	0	0	0	0.000106161	0	0	0	0	0	0	2.82829e-05	0	8.76296e-05	0	0	0	0	0	0	0.000101933	0	0	0	0	0	0	0	0	0	0	0
d__Bacteria;k__norank_d__Bacteria;p__Verrucomicrobiota;c__Lentisphaeria;o__Victivallales;f__Victivallaceae;g__norank_f__Victivallaceae	0	0	0	3.32812e-05	0	0	0	0	0	0	0	5.65659e-05	0	0	0	0	0	0	0	0	0	0	0	0	0	0	0	0	0	0	0	0
d__Bacteria;k__norank_d__Bacteria;p__Verrucomicrobiota;c__Lentisphaeria;o__Victivallales;f__vadinBE97;g__norank_f__vadinBE97	0	0	0	0	3.5387e-05	0	0	0	0	0	0	2.82829e-05	0	0	0	0	0	0	0	0	0	0	0	0	0	0	0	0	0	0	0	0
d__Bacteria;k__norank_d__Bacteria;p__Verrucomicrobiota;c__Verrucomicrobiae;o__Verrucomicrobiales;f__Akkermansiaceae;g__Akkermansia	0	0.0015744	0	0.00173062	0.00141548	0.000213074	0.00443562	0	0	0.000148364	0	8.48488e-05	0.00275466	8.76296e-05	0.000202213	0	0.00051767	0	0	0.000666756	0.000951378	0	0	0.000309626	0	0	0	0.00040907	0.000527179	0	0	0
d__Bacteria;k__norank_d__Bacteria;p__WPS-2;c__norank_p__WPS-2;o__norank_c__norank_p__WPS-2;f__norank_o__norank_c__norank_p__WPS-2;g__norank_f__norank_o__norank_c__norank_p__WPS-2	0	0	0	0	0	0	0	0	0	0	0	0	0	0	0	0	0	0	0	0	0	0	0	0	0	0	0	0	0	0	0	0
d__Bacteria;k__norank_d__Bacteria;p__unclassified_k__norank_d__Bacteria;c__unclassified_k__norank_d__Bacteria;o__unclassified_k__norank_d__Bacteria;f__unclassified_k__norank_d__Bacteria;g__unclassified_k__norank_d__Bacteria	3.33122e-05	0	0.000217628	0.000698905	0.000106161	0.000809682	0.000264813	5.95114e-05	0.00199242	0.000148364	0.000377658	0.000509093	0.000172166	0.00382649	0.000548863	0.00352899	0.000345113	0.000109902	0.000274905	0.000466729	0.000339778	0.000146418	0.000268456	0	0.000572306	0.000185094	0	0.000146096	0.000146439	0.000329272	5.45197e-05	0.000820526
