# Supplementary material for: In vitro fermentation characteristics of polysaccharide from Scrophularia ningpoensis and its effects on type 2 diabetes mellitus gut microbiota
Source: PeerJ. 2025 May 5;13:e19374. doi: 10.7717/peerj.19374 (PMC12060902; doi:10.7717/peerj.19374)
Supplement: Supplemental Information 5 [file peerj-13-19374-s005.xlsx]

## Sheet: Raw data-gas
Sample number	Gas volume (mL)	CO2（umol/ml）	CH4（umol/ml）	H2（umol/ml）	H2S（umol/ml）
HC1	0.55895	0.642977	0	2.60792	0.0944965
HC2	0.757955	0	0	4.30171	0.116869
HC3	0.339608	0.924223	0.0939573	1.05299	0.0230177
HC4	0.523521	0.865064	0	2.21386	0.0693742
HC5	0.973282	1.09398	0	4.33459	0.090111
HC6	1.05947	1.5179	0.0440884	4.25001	0.130335
HC7	0.146681	0.363226	0.0514914	0.500734	0.0138193
HC8	0.762048	0.37616	0	4.0434	0.0205063
Sample number	Gas volume (mL)	CO2（umol/ml）	CH4（umol/ml）	H2（umol/ml）	H2S（umol/ml）
T2DM1	0.289717	0.332039	0.00899483	1.42277	0.0351222
T2DM2	0.624973	0.466813	0	3.19895	0.0419703
T2DM3	0.89147	0.645494	0.00177085	4.40526	0.0553385
T2DM4	0.091591	0.16167	0	0.414604	0.00855699
T2DM5	0.506756	2.06091	0	0.984372	0.0091002
T2DM6	0.569646	0.460751	0	2.9172	0.0265818
T2DM7	0.154346	0.17786	0.00923967	0.785143	0.00452538
T2DM8	0.331361	0	0	2.02882	0.0168407
Sample number	Gas volume (mL)	CO2（umol/ml）	CH4（umol/ml）	H2（umol/ml）	H2S（umol/ml）
HC+SNP1	2.10046	1.64453	0.00840461	8.69948	0.0659825
HC+SNP2	0.401779	2.06966	0	0.37956	0.00723989
HC+SNP3	0.5198	1.04367	0	2.06183	0.0220001
HC+SNP4	1.25699	1.53066	0	5.31961	0.0291802
HC+SNP5	2.09251	3.88063	0	6.43352	0.0739931
HC+SNP6	0.894194	4.60857	0	0.51136	0.00174697
HC+SNP7	0.576138	2.17661	0.204574	1.05915	0
HC+SNP8	0.377152	2.3137	0	0	0
Sample number	Gas volume (mL)	CO2（umol/ml）	CH4（umol/ml）	H2（umol/ml）	H2S（umol/ml）
T2DM+SNP1	0.756746	3.66464	0.206177	0.539531	0.00187655
T2DM+SNP2	0.483318	0.532529	0.0462025	2.34362	9.77572e-06
T2DM+SNP3	1.14887	1.08624	0.000752912	5.27933	0.00583795
T2DM+SNP4	1.21149	6.52773	0.139897	0	0
T2DM+SNP5	1.09129	5.89298	0.0977407	0	0.105688
T2DM+SNP6	0.801926	1.11581	0.0160021	3.50911	0.00729304
T2DM+SNP7	1.35333	1.8648	0	5.37669	0.0787505
T2DM+SNP8	0.741293	4.15868	0.15551	0	0.0166794
