# Supplementary material for: In vitro fermentation characteristics of polysaccharide from Scrophularia ningpoensis and its effects on type 2 diabetes mellitus gut microbiota
Source: PeerJ. 2025 May 5;13:e19374. doi: 10.7717/peerj.19374 (PMC12060902; doi:10.7717/peerj.19374)
Supplement: Supplemental Information 6 [file peerj-13-19374-s006.xlsx]

## Sheet: Raw data-SCFAs
Sample number		SCFA content（umol/ml）
	Total acid	Acetic acid	Propionate	Butyric acid	Isobutyric	Valerate	Isovalerate
HC1	29.7343	18.2778	6.7184	4.3075	0.1058	0.0359	0.2889
HC2	55.9047	25.6058	11.1466	7.8019	3.3754	1.3269	6.6481
HC3	44.6572	18.4512	10.8005	5.978	3.0068	0.115	6.3057
HC4	55.7091	22.4925	11.8605	8.3276	3.8241	0.6962	8.5082
HC5	51.8311	30.2935	8.8662	8.5146	0.7659	1.1227	2.2682
HC6	31.5235	20.7877	6.4957	3.8446	0.1618	0.0314	0.2023
HC7	35.7854	22.749	7.3994	4.6786	0.3003	0.21	0.4481
HC8	38.5073	21.9439	7.9699	6.348	0.7696	0.0473	1.4286
Sample number		SCFA content（umol/ml）
	Total acid	Acetic acid	Propionate	Butyric acid	Isobutyric	Valerate	Isovalerate
T2DM1	18.1303	10.531	6.3649	0.8517	0.1457	0.0344	0.2026
T2DM2	25.8993	17.5802	5.9753	2.1211	0.0106	0.0252	0.1869
T2DM3	20.4869	12.0784	5.957	2.0703	0.1145	0.0196	0.2471
T2DM4	29.8425	16.7247	5.5493	5.4375	0.4864	0.0477	1.5969
T2DM5	21.9123	14.4207	5.0822	1.8506	0.1797	0.0489	0.3302
T2DM6	25.7079	17.1551	6.2827	2.0212	0.0971	0.0057	0.1461
T2DM7	28.4812	11.1942	4.3122	3.5201	2.2719	1.8355	5.3473
T2DM8	16.9756	10.6113	5.9038	0.1562	0.1736	0.0073	0.1234
Sample number		SCFA content（umol/ml）
	Total acid	Acetic acid	Propionate	Butyric acid	Isobutyric	Valerate	Isovalerate
HC+SNP1	30.4921	17.5339	6.632	6.1418	0.0723	0.0385	0.0736
HC+SNP2	30.9854	23.7179	6.6157	0.4472	0.0874	0.0276	0.0896
HC+SNP3	37.36	30.8065	5.8742	0.4488	0.1159	0.0147	0.0999
HC+SNP4	40.7846	26.5256	8.7051	4.7418	0.1777	0.1902	0.4442
HC+SNP5	53.3741	20.7597	16.6168	10.7453	0.9572	2.1155	2.1796
HC+SNP6	41.792	20.0812	20.5296	0.6521	0.3513	0.1185	0.0593
HC+SNP7	36.207	21.3634	14.1871	0.3017	0.2408	0.0578	0.0562
HC+SNP8	40.384	24.366	15.1871	0.2539	0.5239	0.0105	0.0426
Sample number		SCFA content（umol/ml）
	Total acid	Acetic acid	Propionate	Butyric acid	Isobutyric	Valerate	Isovalerate
T2DM+SNP1	40.7551	17.6846	22.5581	0.0944	0.2821	0.087	0.0489
T2DM+SNP2	25.5431	25.1419	0.3689	0.002	0.0125	0.0173	0.0005
T2DM+SNP3	32.3179	10.5976	18.0348	3.6145	0.0413	0.0281	0.0016
T2DM+SNP4	18.5731	16.6171	0.7347	0.7311	0.0909	0.2431	0.1562
T2DM+SNP5	32.938	13.7893	5.2298	13.6061	0.0557	0.0497	0.2074
T2DM+SNP6	43.6526	20.2427	22.8582	0.4718	0.0719	0.0035	0.0045
T2DM+SNP7	51.7081	10.3755	12.2114	11.4737	3.2401	7.9648	6.4426
T2DM+SNP8	37.6708	18.3518	18.3154	0.1868	0.7593	0.0082	0.0493
