# Supplementary material for: In vitro fermentation characteristics of polysaccharide from Scrophularia ningpoensis and its effects on type 2 diabetes mellitus gut microbiota
Source: PeerJ. 2025 May 5;13:e19374. doi: 10.7717/peerj.19374 (PMC12060902; doi:10.7717/peerj.19374)
Supplement: Supplemental Information 7 [file peerj-13-19374-s007.xlsx]

## Sheet: Raw data-metabolites
Sample number	Methylamine, 2TMS derivative	2-Methylpropanoic acid, TMS derivative	Butyric Acid, TMS derivative	Ethylene glycol, 2TMS derivative	Glycine, TMS derivative	L-Alanine, TMS derivative	Phenol, 4-ethyl-2-methoxy-	Pentanoic acid, TMS derivative	Boric acid, 3TMS derivative	Propylene glycol, 2TMS derivative	2,3-Butanediol, 2TMS derivative	3-Pyridinol, TMS derivative	Methyltris(trimethylsiloxy)silane	1,3-Propanediol, 2TMS derivative	Lactic Acid, 2TMS derivative	Glycolic acid, 2TMS derivative	L-Valine, TMS derivative	L-Alanine, 2TMS derivative	5-Amino-1-pentanol, TMS derivative	Glycine, di-TMS	2-Hydroxybutyric acid, 2TMS derivative	2-Furoic acid, TMS derivative	4-Pyridinol	Hydracrylic acid, 2TMS derivative	2-Pyrrolidinone, TMS derivative	L-Alanine, TMS derivative	L-Leucine, TMS derivative	1,4-Butanediol, 2TMS derivative	2-Hydroxy-2-methylbutyric acid, 2TMS derivative	L-Proline, trimethylsilyl ester	2-Aminobutanoic acid, 2TMS derivative	L-Isoleucine, TMS derivative	5-Aminovaleric acid, tert.-butyldimethylsilyl ester	L-Valine, 2TMS derivative	4-Hydroxybutanoic acid, 2TMS derivative	2-Hydroxyisocaproic acid, 2TMS derivative	L-Norvaline, 2TMS derivative	Benzoic Acid, TBDMS derivative	L-Serine, 2TMS derivative	Propane, 2-isocyanato-2-methyl-	Ethyl pipecolinate	4-tert-Octylphenol, TMS derivative	Ethanolamine, 3TMS derivative	L-Leucine, 2TMS derivative	Glycerol, 3TMS derivative	Niacin, TMS derivative	L-Isoleucine, 2TMS derivative	Benzeneacetic acid, TBDMS derivative	L-Threonine, 2TMS derivative
HC1	8.62074e+06	2.26866e+06	5.6232e+06	2.17718e+06	0	1.44868e+07	0	0	187028	0	649139	788342	0	4.69283e+06	3.25108e+06	477961	1.97501e+07	3.27116e+07	0	333093	1.0919e+06	0	0	348992	0	0	3.34121e+07	331501	427333	1.99955e+07	0	1.69618e+07	0	3.63899e+07	0	909869	0	0	1.88309e+06	0	0	285913	0	3.88614e+07	0	115590	2.1659e+07	0	0
HC2	9.67414e+06	4.68831e+06	1.23664e+07	1.97446e+06	0	0	0	8.14866e+06	196378	0	0	881699	0	4.60733e+06	0	516178	874774	1.11049e+06	0	0	61775.7	0	0	0	0	0	1.03053e+06	331253	0	2.87136e+07	0	0	26581.9	823974	0	0	0	27059.2	426901	0	232180	0	142005	0	0	0	753879	1.7437e+07	0
HC3	1.09673e+07	2.32162e+06	7.22228e+06	2.31116e+06	0	0	0	512347	292724	0	0	1.03753e+06	0	5.14198e+06	978778	368986	834370	872325	0	0	246831	0	0	205815	0	0	761494	371522	368360	2.04455e+07	0	0	699540	742418	0	355680	0	0	522234	0	0	0	144138	544126	0	14859.4	418334	1.42134e+07	0
HC4	9.9724e+06	2.79047e+06	8.54968e+06	2.55571e+06	0	0	0	2.37688e+06	320758	0	0	840550	0	4.54843e+06	750678	370884	1.07243e+06	779002	0	0	60526.3	0	0	0	0	0	843700	321347	0	1.96826e+07	0	0	309232	1.14795e+06	0	0	0	24604.5	584437	0	212343	155257	0	632545	0	21096.6	619148	2.09853e+07	0
HC5	3.18112e+06	1.32615e+06	3.00324e+06	483274	0	3.66097e+06	0	1.31445e+06	67177.5	0	456511	0	0	1.44456e+06	323527	184396	1.1272e+07	1.05044e+07	0	0	0	0	0	0	0	0	2.07806e+07	93404.2	0	8.31317e+06	0	9.97139e+06	282709	2.98818e+07	0	0	0	0	187526	0	0	0	0	2.81653e+07	0	0	1.35891e+07	0	0
HC6	3.36011e+06	0	1.38715e+06	519764	0	4.76112e+06	0	149653	93750.9	0	438828	0	0	2.11103e+06	2.33248e+06	166092	8.2692e+06	1.04319e+07	0	148300	775472	0	0	264333	0	0	1.71155e+07	86940.1	0	9.35763e+06	0	7.41543e+06	0	1.88612e+07	0	353111	0	0	377616	0	0	0	0	2.16412e+07	0	44426.3	8.87643e+06	0	0
HC7	3.62584e+06	0	2.42624e+06	506467	0	4.0283e+06	0	144662	60908.6	0	245095	339137	0	2.11589e+06	2.17536e+06	195452	7.61607e+06	9.78602e+06	0	181076	520524	0	0	210963	0	0	1.6905e+07	0	125286	8.15616e+06	0	6.77916e+06	0	2.14761e+07	0	240360	0	0	889791	0	0	0	0	2.69622e+07	0	52006.5	1.07416e+07	0	0
HC8	3.48579e+06	1.62491e+06	3.58139e+06	543950	0	4.07509e+06	0	118937	174196	0	1.6536e+06	0	0	1.96773e+06	834583	204499	9.46036e+06	9.78007e+06	0	0	281214	0	0	236808	0	0	1.46034e+07	149873	303687	1.76063e+06	0	6.25564e+06	761347	2.28234e+07	0	800784	0	0	317925	0	0	0	419076	1.99428e+07	0	23808	7.67595e+06	94083.7	0
T2DM1	8.89552e+06	0	0	1.69139e+06	391770	0	0	0	0	0	937377	787388	0	3.92738e+06	1.64435e+07	0	1.87156e+07	2.26732e+07	0	1.72961e+06	2.47269e+06	0	0	778399	165538	0	1.43898e+07	309398	247873	1.67894e+07	0	1.70718e+07	0	3.43433e+07	0	819192	0	0	1.11593e+06	0	0	0	0	4.04192e+07	0	182700	1.85647e+07	86599.5	0
T2DM2	9.92607e+06	0	4.91233e+06	1.77992e+06	0	2.25116e+07	0	0	571838	0	0	867514	0	4.48758e+06	7.55116e+06	485274	2.62293e+07	4.05968e+07	0	527455	3.63514e+06	0	0	410400	132808	0	1.7266e+07	427688	542272	2.04429e+07	0	2.33103e+07	0	4.19354e+07	0	1.06156e+06	0	0	2.10365e+06	0	0	0	0	4.38103e+07	0	201734	2.47016e+07	0	0
T2DM3	4.61217e+06	0	5.1646e+06	4.92135e+06	249282	3.5902e+07	0	0	361672	0	1.81755e+06	0	0	3.55349e+06	670222	454089	3.9447e+07	4.05408e+06	0	222364	472761	0	0	0	0	0	3.82743e+07	388602	161990	9.69188e+06	0	2.22365e+07	0	8.72922e+06	0	793859	0	30346.1	875677	0	0	0	0	7.52264e+06	0	156294	3.19136e+06	0	0
T2DM4	7.37091e+06	2.34915e+06	2.75019e+06	0	496351	84847.1	0	1.26887e+06	0	0	1.83983e+06	0	0	5.32407e+06	578268	497668	2.97302e+07	3.18243e+07	0	1.64971e+06	0	0	0	0	0	0	1.5629e+07	255900	236962	3.16658e+07	0	2.65209e+07	301548	4.07871e+07	0	396715	0	17865.5	2.43289e+06	0	0	0	129631	3.48685e+07	0	165636	2.13692e+07	0	0
T2DM5	3.81349e+06	717690	0	730729	0	4.33891e+06	0	0	210573	0	0	0	0	1.85299e+06	1.83435e+06	0	5.60504e+06	1.11276e+07	0	0	427211	0	0	127162	0	0	1.39882e+07	89320.1	0	7.03502e+06	0	5.61837e+06	0	2.30802e+07	0	0	0	0	809679	0	0	74556	0	2.76313e+07	0	32920	1.15003e+07	0	0
T2DM6	4.89877e+06	354076	1.22306e+06	931714	0	3.82304e+06	0	57795.2	263912	0	406505	342016	0	1.76295e+06	2.49747e+06	0	6.42362e+06	9.13151e+06	0	512418	223691	0	0	293534	0	0	1.76876e+07	106714	0	3.22437e+06	0	5.19466e+06	0	2.0881e+07	0	0	0	0	225456	0	0	95516	0	2.99894e+07	0	44552.2	9.38197e+06	0	0
T2DM7	5.13651e+06	686918	2.51012e+06	863690	0	4.44894e+06	0	7.15759e+06	256362	0	2.23626e+06	307402	0	2.40243e+06	218863	237487	5.56869e+06	1.2498e+07	0	0	0	0	0	0	0	0	3.70716e+06	98441.6	0	1.0823e+07	0	4.1766e+06	0	1.41413e+07	0	0	0	0	911665	0	0	0	0	5.38074e+06	0	0	6.13594e+06	456146	0
T2DM8	4.03326e+06	0	264705	663930	0	3.93898e+06	0	0	264505	0	0	0	0	1.71739e+06	2.64842e+06	0	4.87559e+06	9.28183e+06	0	621925	443183	0	0	219100	0	0	1.34736e+07	69990.1	0	5.79165e+06	0	5.08936e+06	0	1.77176e+07	0	0	0	0	1.70245e+06	0	0	87767.5	0	2.51498e+07	0	43444.2	9.42814e+06	0	0
HC+SNP1	4.97894e+06	765581	765581	858107	0	5.65464e+06	13878.1	0	149408	93960.5	143246	470639	0	1.57054e+06	6.82713e+06	0	5.58029e+06	1.15124e+07	0	281937	157632	0	25903.7	1.14656e+06	0	0	1.95194e+07	87842.4	0	2.32328e+06	0	5.11359e+06	0	1.66479e+07	0	62490.7	0	0	2.20304e+06	0	0	95743.4	0	2.75448e+07	3.83997e+07	0	2.4439e+07	0	0
HC+SNP2	4.09507e+06	1.17907e+06	3.83665e+06	683152	0	3.77233e+06	0	1.54491e+06	116164	0	1.59777e+06	355465	178361	2.82699e+06	3.04861e+06	360012	7.02766e+06	1.35877e+07	0	722937	561899	0	218563	0	0	0	1.0133e+07	97543.8	218196	9.86237e+06	4.04291e+06	5.50777e+06	0	2.39406e+07	0	0	374316	0	143013	59762.1	0	100410	0	2.05588e+07	4.03582e+06	0	1.21848e+07	0	0
HC+SNP3	1.08111e+07	1.07827e+06	1.07827e+06	2.72893e+06	0	2.06529e+07	0	0	924546	265133	0	1.4136e+06	959951	4.71655e+06	0	1.02275e+06	2.35049e+07	2.7431e+07	0	924806	0	42973.1	88091.1	664696	0	1.75188e+07	0	461086	223880	1.12073e+07	0	1.79031e+07	0	2.86037e+07	192034	727283	0	0	6.20245e+06	184926	0	410887	0	3.57824e+07	1.26221e+07	160309	1.75175e+07	0	0
HC+SNP4	1.0686e+07	3.73227e+06	1.42421e+07	2.38811e+06	0	3.17887e+07	0	0	1.26202e+06	0	1.33346e+06	1.38045e+06	1.18855e+06	5.80285e+06	0	1.52184e+06	3.30045e+07	4.56665e+07	0	1.2232e+06	7.93563e+06	54101.9	108602	0	0	2.26396e+07	0	0	846269	1.52564e+07	0	2.59689e+07	0	4.06358e+07	0	3.97355e+06	0	0	1.84043e+06	228324	0	0	0	4.60657e+07	0	284619	2.38403e+07	0	0
HC+SNP5	7.16625e+06	0	696045	0	1.37657e+06	0	0	39356.6	173262	0	0	1.0657e+06	731605	3.51013e+06	0	1.07527e+06	2.43261e+07	1.59656e+07	0	3.14017e+06	0	60215	101750	0	1.58668e+06	1.84294e+07	0	373994	0	1.18857e+07	0	1.99051e+07	0	2.22338e+07	238150	926076	0	23401	1.69612e+07	332718	0	317355	0	2.69543e+07	0	200214	0	0	2.38149e+07
HC+SNP6	1.02619e+07	0	2.03798e+06	2.49489e+06	0	2.66351e+07	36002	862209	438517	0	0	1.3653e+06	957286	6.15341e+06	0	1.30876e+06	2.94395e+07	3.87325e+07	2.60123e+06	0	671413	51930.8	96233.7	0	873577	1.92036e+07	0	491946	730165	8.66688e+06	0	2.26765e+07	0	3.86407e+07	277774	1.88977e+06	0	0	5.78886e+06	280927	0	385720	0	4.20295e+07	5.36314e+07	203229	2.30614e+07	0	0
HC+SNP7	3.41467e+06	0	0	812103	0	4.59633e+06	0	0	108584	88799.3	0	320270	171301	881207	5.51298e+07	0	2.49042e+06	8.34049e+06	300702	342011	12015.8	0	0	480227	0	0	9.74653e+06	75129.3	101681	1.39819e+06	0	2.44344e+06	0	7.20574e+06	0	181978	0	0	2.55879e+06	36082.7	0	59899.9	0	1.30647e+07	3.72889e+07	28137.8	0	0	5.76365e+06
HC+SNP8	3.51626e+06	0	0	925885	0	0	0	3803.93	66591.2	0	0	306834	212688	708568	1.13805e+07	251766	3.11843e+06	6.76257e+06	229844	297818	80617	0	0	615739	0	0	1.12979e+07	0	66577.6	1.08515e+06	0	2.78918e+06	0	6.03353e+06	0	289567	0	0	2.53729e+06	32542.3	0	55371.1	0	1.01033e+07	3.63102e+07	24962.7	0	0	6.00718e+06
T2DM+SNP1	3.22838e+06	0	508567	739401	1.06927e+06	2.07369e+07	0	0	1.68068e+06	72496.6	0	471131	341459	1.57631e+06	2.26385e+07	409129	1.35206e+07	3.53342e+06	0	707510	0	24689.2	223850	2.474e+07	0	0	79367.8	0	2.37714e+06	9.02338e+06	0	244795	0	2.88155e+06	0	203473	0	0	5.42286e+06	0	0	225560	0	3.52377e+06	3.72356e+07	62288.5	0	0	8.20329e+06
T2DM+SNP2	3.37448e+06	1.26454e+07	0	770957	640035	2.1159e+07	6.12932e+06	4.30234e+06	0	0	1.54032e+06	465593	403670	1.62964e+06	2.2229e+07	557926	1.43141e+07	1.48132e+07	0	1.31259e+06	234570	23766.7	63511.3	0	582385	0	2.47195e+07	256623	226479	6.37605e+06	0	1.17598e+07	0	1.01526e+07	174260	276968	232747	0	3.47485e+06	139755	0	0	0	9.17438e+06	6.32666e+06	97415.1	0	0	7.65496e+06
T2DM+SNP3	3.16123e+06	103999	263738	470931	0	0	0	0	0	0	0	263923	208642	720446	1.2298e+06	225682	1.92162e+06	4.04608e+06	0	180916	114506	0	20554.2	518765	0	0	6.60414e+06	0	0	0	0	1.5704e+06	0	7.11055e+06	32121.4	84441.7	0	0	0	25884.9	0	97754	0	1.55508e+07	0	13199	4.53987e+06	0	0
T2DM+SNP4	5.24607e+06	0	0	1.43813e+06	0	7.78344e+06	27775.6	0	67283.5	183962	459964	502647	215881	1.33705e+06	4.20511e+06	475187	8.34172e+06	1.09597e+07	1.36224e+06	753040	432836	16830	46229	1.40808e+06	0	0	2.17734e+07	166394	0	3.49781e+06	0	7.37422e+06	0	1.19984e+07	73104.7	82698.3	0	19597	679267	92806.9	0	0	0	1.81759e+07	2.01982e+07	39806.3	0	0	9.43696e+06
T2DM+SNP5	4.43387e+06	0	2.59704e+06	781332	185007	9.33901e+06	15613.3	0	44814	124745	395196	459076	352198	1.04626e+06	8.76326e+06	350465	7.50848e+06	1.41853e+07	1.43676e+06	694792	1.14122e+06	0	60327.7	1.02707e+06	0	0	1.89088e+07	169763	252688	2.60473e+06	0	6.56987e+06	0	1.07671e+07	0	334225	0	0	2.33407e+06	89406.7	0	0	0	1.6453e+07	0	42627.2	0	0	1.84658e+06
T2DM+SNP6	3.50628e+06	0	0	665103	0	2.44962e+06	0	0	63434.5	364957	0	295419	207961	827035	2.57745e+07	232627	2.22104e+06	6.08229e+06	421621	0	655877	0	0	556812	0	0	1.06982e+07	0	130219	1.24061e+06	0	2.48781e+06	0	7.93638e+06	0	222348	0	0	1.87511e+06	30488	0	114526	0	1.60134e+07	3.65328e+07	0	0	0	6.37622e+06
T2DM+SNP7	2.80385e+06	547519	2.44369e+06	335060	0	0	0	1.87865e+06	0	0	69003.4	136674	104569	220321	64843.7	45657.6	109458	266547	55111.9	26919.2	0	0	0	0	0	0	98445	35477.9	0	366595	0	0	0	52567.6	0	0	0	0	91773.8	0	0	51315.4	0	0	0	0	0	0	0
T2DM+SNP8	1.36165e+06	5.5097e+06	1.79841e+06	0	0	1.39443e+06	0	0	0	0	0	0	95016	310882	243319	119936	2.11791e+06	2.15727e+06	735811	0	351589	0	0	351589	0	0	5.80028e+06	0	0	753717	0	1.74014e+06	0	3.84269e+06	0	0	0	0	435553	0	0	0	0	5.98057e+06	1.65056e+07	11752.2	0	0	3.33978e+06
[truncated: 71 more columns]
